# Supplementary material for: Hypoxia-Induced miR-210 Is Necessary for Vascular Regeneration upon Acute Limb Ischemia
Source: Int J Mol Sci. 2019 Dec 24;21(1):129. doi: 10.3390/ijms21010129 (PMC6981725; doi:10.3390/ijms21010129)

3 **HYPOXIA-INDUCED MIR-210 IS NECESSARY FOR VASCULAR REGENERATION**  
4 **UPON ACUTE LIMB ISCHEMIA**

5

6 Germana Zaccagnini<sup>1\*#</sup>, Biagina Maimone <sup>1\*</sup>, Paola Fuschi <sup>1</sup>, Marialucia Longo <sup>1</sup>, Daniel Da  
7 Silva <sup>1</sup>, Matteo Carrara <sup>1</sup>, Christine Voellenkle <sup>1</sup>, Laura Perani <sup>2</sup>, Antonio Esposito <sup>2,3</sup>, Carlo  
8 Gaetano<sup>4</sup>, Fabio Martelli <sup>1#</sup>

9

10 <sup>1</sup>Laboratory of Molecular Cardiology, IRCCS Policlinico San Donato, 20097 San Donato  
11 Milanese, Milan, Italy.

12 <sup>2</sup> Preclinical Imaging Facility, Experimental Imaging Center, San Raffaele Scientific  
13 Institute, 20132 Milan, Italy.

14 <sup>3</sup> Vita-Salute San Raffaele University, 20132 Milan, Italy.

15 <sup>4</sup> Laboratorio di Epigenetica, Istituti Clinici Scientifici Maugeri, via Maugeri 4, 27100 Pavia,  
16 Italy.

17

18 **SUPPLEMENTAL DATA**

19

20 **Material and Methods**

21 **Mouse models**

22 All experimental procedures complied with the Guidelines of the Italian National  
23 Institutes of Health and with the *Guide for the Care and Use of Laboratory Animals* (Institute of  
24 Laboratory Animal Resources, National Academy of Sciences, Bethesda, Md) and were  
25 approved by the institutional Animal Care and Use Committee (IACUC 666, approval date  
26 02/19/2015, authorization 96/2015-PR and IACUC 709, approval date 08/31/2015,  
27 authorization 221/2015-PR).

28 Before all surgical and perfusion procedures, mice were anesthetized with an  
29 intraperitoneal injection of 10 mg/kg xylazine (Intervet Farmaceutici, Milan, Italy) and 100

30 mg/kg ketamine (Ketavet 100; Intervet Farmaceutici, Milan, Italy). One day before and 7  
31 days after surgical procedure, acetaminophen 1mg/ml was administrated in drinking water  
32 as analgesic drug. Fresh solution was prepared every 3 days for maximum efficacy.

33 For ANTI-210 experiments, 8-12 weeks old C57BL/6N male mice (Charles River  
34 laboratories, Calco (Lecco), Italy) were used. For transgenic mouse experiments of hindlimb  
35 ischemia, 8-12 weeks old doxycycline inducible transgenic C57BL/6NTac-  
36 *Gt(ROSA)26Sor<sup>tm3720(Mir210)Tac</sup>* (Tg210, Taconic Artemis, Germany) male mice and Wild Type  
37 littermate (WT) were used. The generation of Tg210 mice has been previously described in  
38 detail<sup>1</sup>. Briefly, the miR-210 coding region was inserted into the ROSA26 locus by using a  
39 targeting strategy that allows doxycycline inducible overexpression of miR-210.

40 Acute hindlimb ischemia was induced by removing the femoral artery, as previously  
41 described<sup>2</sup>.

42 Myocardial infarction was induced by coronary artery ligation in 8-12 weeks old Tg210,  
43 female mice and WT littermate under anesthesia and mechanically ventilated. Briefly,  
44 thoracotomy was performed via the third left-intercostal space and the left coronary artery  
45 was ligated. The chest was closed and the mice were allowed to recover. Sham-operated  
46 mice underwent a similar surgical procedure, except that the ligature around the coronary  
47 artery was not tied. Animals were euthanized 1 month after surgery.

48 All mice were housed in groups of three to five at 22°±2 C using a 12 h light-12 h dark  
49 cycle. Unless otherwise stated, animals were fed normal chow diet (SDS, irradiate VRF1).  
50 For miR-210 induction, WT and Tg210 mice were fed with pellets of food containing  
51 Doxycycline (Mucedola, Settimo Milanese (MI) Italy, NFM18 diet added with doxycycline  
52 hyclate 2000 mg/kg). Doxycycline was administrated to WT littermate too, in order to  
53 exclude side effects of the drug. The effectiveness of miR-210 induction was assessed by  
54 qPCR on quadriceps femoris muscles or liver samples of each mouse analyzed.

## 55 **Inhibition of miR-210 *in vivo***

56 *In vivo* down modulation of miR-210 was carried out by intraperitoneal injection of LNA  
57 oligonucleotides against miR-210 (ANTI-210) or a scrambled control sequence (SCR) (In  
58 vivo LNA microRNA Inhibitors; Exiqon, Vedbaek, Denmark). The following 15mers LNA-

enhanced sequences with complete phosphothioate backbone were used: ANTI-210, GCTGTCACACGCACA; SCR, CGTCTAGCCACCTAG. WT mice underwent hind limb ischemia (day 0) and then they were randomized in two groups. After 5 days of ischemia, one group (ANTI-210) received one intraperitoneal injection of 12 mg/kg LNA-anti-miR-210 diluted in 200 µl of saline. The second group (SCR) received the same dose of scrambled sequence (SCR), as control. Both groups were sacrificed by overdose of anesthetic, 7 and 14 days after surgery. The effectiveness of ANTI-210 treatment was assessed by qPCR in each mouse on quadriceps femoris muscles or liver samples.

**Ultrasonography and image analysis**

Ultrasound imaging was performed using a high performance ultrasonographic Imaging System (Vevo 2100; FUJIFILM Visualsonics inc., Toronto, Ontario, Canada), with a 40 MHz linear probe (MD550; Vevo 2100; Fujifilm VisualSonics Inc., Toronto, Ontario, Canada).

*Measurement of calf perfusion* Calf perfusion measurement were performed as previously described<sup>1</sup>. Mice were maintained under general anesthesia obtained by 1.5–2% isoflurane (Iso-Vet, Piramal Critical Care, West Drayton, UK) vaporized in 100% oxygen (flow: 1l/min), in supine position. Body temperature was monitored with a rectal probe. During the acquisition the temperature of the animal was maintained between 37°±1 C and the administration of the anesthetic was adjusted to maintain the heart rate of the animal from 500 to 580 bpm. Measurement of perfusion were carried out by Ultrasound device VEVO 2100 ( FUJIFILM Visualsonics inc., Toronto, Ontario, Canada) in ischemic and non-ischemic controlateral calves, using a 2100 transducer in power Doppler mode (transmit Power 100%; center frequency 32 MHz; gate 2; pulse repetition frequency; beam angle 0; Doppler gain 35 dB; dynamic range 35 dB), 7 days after ischemia. The calf percentage of vascularization (PV) is determined using the Vevo LAB analysis software (FIJIFILM VisualSonics Inc., Toronto, ON, Canada) that calculate the percentage of pixels which have a Power Doppler signal associated with them. Residual calf perfusion was expressed as vascularity ratio (left ischemic/right non ischemic).

*Transthoracic echocardiography.* Mice were initially anesthetized with 4% isoflurane with oxygen and maintained at 0,5-1% isoflurane with oxygen during imaging at a rate of 1liter/minute, administered via nose cone. Anesthetized mice were positioned supine on a heated imaging platform (THM150 MousePad part of the VisualSonics Vevo Integrated Rail System III) and legs taped to electrocardiograph (ECG) leads to monitor heart and respiration rates. Body temperature was monitored with a rectal probe. A depilatory cream (Veet, Reckitt Benkiser, Milan, Italy) was used to remove fur from the anterior thorax and prewarmed ultrasound gel (Aquasonic, Parker Laboratories Inc., Fairfield, NJ, USA) was used as a coupling agent between the ultrasound probe and the skin. The probe was held in position by a clamp mounted on the Vevo Rail System to avoid any compression of the thorax and any small movement of the probe. During the acquisition the temperature of the animal was maintained between  $37^{\circ}\pm 1$  C and the administration of the anesthetic was adjusted to maintain the heart rate of the animal from 500 to 580 bpm.

All image acquisitions and offline measurements were conducted by a single experienced operator who was blinded to animal groups. Frame rate of >200 frames per minute was maintained for all B-mode and M-mode images. M-mode short-axis images were recorded at the level of the papillary muscles and the LV was bisected to obtain an optimal M-mode selection. For the analysis of M –mode Images, the Vevo LAB analysis software (Fujifilm VisualSonics Inc., Toronto, ON, Canada) was used. Conventional echocardiographic measurements of the LV included Ejection Fraction (EF), Fractional shortening (FS), end-diastolic dimension (EDD), end-systolic dimension (ESD), anterior and posterior wall thickness, and mass.

### **Matrigel plug assay**

The *in vivo* angiogenic Matrigel assay was performed as previously described<sup>3</sup>. Eight-ten weeks old C57Bl/6N male mice were treated with ANTI-210 or SCR 12 mg/kg 2 days before Matrigel injection (day -2). Next, 500  $\mu$ l of Matrigel<sup>TM</sup> Basement Membrane Matrix (CULTREX, Trevigen, Helgerman Court, Gaithersburg, MD 20877 USA) were loaded with pro-angiogenic factors (200 ng/ml VEGF, 1 mg/ml FGF2 and 0.1 mg/ml Heparin) and injected subcutaneously along the abdominal midline. Seven days after the first injection

116 (day 5 after Matrigel implant), the mice received a second dose of LNA oligonucleotides.  
117 Two days later, at 7 days from Matrigel injection, mice were sacrificed and Matrigel plugs  
118 were carefully dissected, formalin fixed and processed for paraffin inclusion and sectioning.  
119 To analyze the efficacy of ANTI-210 treatment, skin and adductor muscles were snap-frozen  
120 for RNA extraction and miRNA quantification by qPCR.

### 121 **Genotyping analysis**

122 Genomic DNA was extracted from tail biopsies. Tails were incubated with proteinase K  
123 (LS004222, Worthington Biochemical Corporation, Lakewood, NJ, USA) 20mg/ml in  
124 DirectPCR® Lysis Reagent (102-T; Viagen Biotech, Inc. Los Angeles, CA, USA) over night  
125 (O.N) at 55°C and then they were incubated for 45 min at 85°C. 2 µl of lysates was used for  
126 PCR genotyping. PCR reaction was performed to identify the presence of the miR-210  
127 coding region in the constitutive Knock-In 1 allele (656-bp fragment), using the following  
128 primers: forward primer 5'-CCTGCAATATTTGCATGTCG-3' and reverse primer 5'-  
129 GTCCCTATTGGCGTTACTATGG-3'. The unmodified ROSA26 locus (299-bp fragment)  
130 was amplified as a control and to determine the zygosity of the locus, using the following  
131 primers: forward primer 5'-CTCTTCCCTCGTGATCTGCAACTCC-3' and reverse primer  
132 5'-CATGTCTTTAATCTACCTCGATGG-3'. PCR conditions were as follows: pre-  
133 denaturation at 95°C for 5 min, followed by denaturation at 95°C for 30 s, primer annealing  
134 at 60°C for 30 s, and extension at 72°C for 1 min (35 cycles), and finally an additional  
135 extension at 72°C for 10 min<sup>1</sup>. Genomic DNA samples from founder TG-210 mice and from  
136 WT mice were used as positive and negative controls, respectively, in each PCR reaction.  
137 The reaction was analyzed on 1.5% agarose gels containing ethidium bromide.

### 138 **Sample preparation**

139 For RNA extraction, muscles were snap frozen in liquid nitrogen. For histological analysis  
140 of ischemic muscles, mice underwent euthanasia by overdose of anaesthesia and were  
141 perfused with PBS pH 7.5, followed by 10% buffered formalin, at 100 mm/Hg for 10 min<sup>2</sup>.  
142 The perfusion was carried out *via* left ventricle for gastrocnemius muscle harvesting and *via*  
143 abdominal aorta for heart harvesting. Next, samples were harvested, fixed and paraffin

144 embedded. For Matrigel assay, Matrigel plugs were carefully dissected and processed for  
145 paraffin inclusion and sectioning.

146

147 **Tables**

148 **Table S1**

149 The primers listed below were used for qPCR analysis:

|        | Forward                | Reverse                |
|--------|------------------------|------------------------|
| Col1a1 | ACAGTCGCTTCACCTACAGC   | GGGTGGAGGGAGTTTACACG   |
| Fn1    | TCATGTTCCGGGCCTCAATC   | ATGGCGTAATGGGAAACCGT   |
| Col3a1 | TGGCAACCCTGGAATAGCTG   | CTGGCTCCTGGTTTTCCACT   |
| Ap1b1  | TGGACATGCTTCTGGTGTGA   | GCAGGATCAGACATCCCCA    |
| Ap1m1  | AGCCCTTGACCACATCAGTG   | GAGGCCTTGTACAGTGAGGG   |
| Egf    | ACTGGACGGTTTGCCTCTTT   | GCGTTCCTGAGAGTGAGCTA   |
| Mmp2   | TGTATGCCCTTCGCTCGTTT   | AGTGAGGAGGGGAACCATCA   |
| MfsD7b | CACCTGTGTCTGCCTTCATC   | ATAGGTGCCATTCCAGTTGC   |
| Fgf1   | ACCATCCGGGTATTTGCTCA   | GGTGTGACTGACCGTTGAGG   |
| Lox    | GGACCGTGGTCTAGCTTTCC   | GCTAGGACGTTGGGTAGCTG   |
| Cited2 | GGCAACATGAATGCCACGAG   | TTGGGGTTGCAATCTCGGAA   |
| Fzr1   | GCATTGCCACCCTTTGTCTG   | GGCAGTGGAGATGGGGTATG   |
| Mdh1   | AGCCCAATCAATTCAGAGGGA  | TCTGCAACCTTCTTACAGCTAA |
| Suc1g2 | GCTTCCAGAAGGGTACAGCTAA | GTACTGGAATTAGGGGCCAGTG |

150 **Table S1.** Sequences of qPCR primers

151

152 **Figure legends**

153 **Figure S1**

154 **MiR-210 induction in C57BL/6N mice following ischemia.** The bar graph shows miR-210  
155 levels measured by qPCR in ischemic gastrocnemius muscles, expressed as fold induction  
156 versus the non-ischemic controlateral muscles at different time points of hindlimb ischemia

157 (n=3-4; Two way Anova multiple comparison, non-ischemic versus ischemic \*p=0.02;  
158 \*\*P≤0.004, #P<0.0001).

## 159 **Figure S2**

160 **Time course of capillary density after hindlimb ischemia in C57BL/6N mice.** Capillary  
161 density was quantified in hematoxylin/eosin stained sections of ischemic gastrocnemius  
162 muscles compared to non-ischemic muscles at different times of ischemia. Box plot shows  
163 quantification of capillary density (n=4-6; Anova multiple comparison \*P=0.01, \*\*P=0.001;  
164 #P=0.0001).

## 165 **Figure S3**

166 **Schematic representation of loss- and gain-of function experiments. A.** Loss of function:  
167 schematic representation of miR-210 blocking in hindlimb ischemia. WT mice underwent  
168 hindlimb ischemia (day 0) and, at day 5, were randomized into two groups for further  
169 treatments. In one of the groups, miR-210 function was blocked by systemic administration  
170 of ANTI-210; the second group received a SCR sequence and was used as control. In both  
171 groups, the angiogenic response was analyzed 2 and 7 days later (at 7 and 14 days of  
172 ischemia respectively) by power Doppler and histological analysis. **B.** Gain of function:  
173 schematic representation of miR-210 overexpression. WT and Tg210 untreated mice (UT)  
174 underwent surgery at time 0. After 4 days and until the end of the study, both groups were  
175 fed with pellets of food containing doxycycline to induce miR-210 over-expression  
176 (Tg210<sup>Doxycy</sup>) or as control (WT<sup>Doxycy</sup>). The angiogenic response was analyzed 3 days later (at 7  
177 days of ischemia) by power Doppler and histological analysis.

## 178 **Figure S4**

179 **Effective miR-210 inhibition and overexpression *in vivo*.** **A.** The bar graph shows miR-  
180 210 levels measured in ischemic quadriceps femoris muscles by qPCR and expressed as fold  
181 change versus the SCR controls, after 2 or 7 days of treatment (n=6-8, Two way Anova  
182 #P<0.0001). **B.** The bar graph shows miR-210 levels measured in non-ischemic  
183 gastrocnemius muscles by qPCR and expressed as fold induction versus WT controls, after  
184 doxycycline administration (n=3-9; Anova multiple comparison #P=0.0001).

## **Figure S5**

**MiR-210 modulates capillary density at 14 days of ischemia.** Box plot shows quantification of capillaries/mm<sup>2</sup> in SCR and ANTI-210 gastrocnemius muscle sections at day 14 of ischemia. (n=6; test T \*\*p<0.001).

## **Figure S6**

**GO Biological Process terms enriched upon miR-210 blocking.** Terms characterized by significant enrichment are shown as coloured circles, connected by edges when the terms are functionally related in the GO tree. For each cluster of terms, the most significant and possibly an additional biologically meaningful one are captioned. Circles are coloured based on their membership to a specific branch the GO tree. Multiple colours define terms that are part of more than one biological process. (SCR n=11, ANTI-210 n= 11, FDR <0.001).

## **Figure S7**

**Heat map of validated differentially expressed genes.** The level of the indicated genes was measured in SCR and ANTI-210 ischemic gastrocnemius muscles by microarrays analysis 7 days after ischemia and was validated by qPCR, (n=11/group). The heat map shows average expression levels where green and red colours indicate down- or upregulation, respectively. A general concordance between modulations measured by microarray and qPCR was observed.

## **Figure S8**

**A. Schematic representation of myocardial infarction experiments.** WT and Tg210 untreated mice (UT) underwent surgery at time 0. After 3 days mice received transthoracic echocardiography to assess cardiac function. Starting from day 3 and until the end of the study, both groups were fed with food containing doxycycline to induce miR-210 overexpression (Tg210<sup>Dox</sup>) or as control (WT<sup>Dox</sup>). At day 30, mice underwent a second echocardiography and were euthanized for samples harvesting and histological analysis. **B.** Box plot represents miR-210 fold change measured by qPCR in healthy hearts after 5 days of doxycycline treatment (N=5; \*\*P=0.002).

## **Figure S9**

213 **Fractional shortening assessment in sham operated or infarcted mice at day 3.** Box plot  
214 represents the percentage of fractional shortening (%FS) measured in sham operated mice  
215 at day 3 or 30 (N=9) and in MI mice at day 3 after surgery (N=18-20). A similar %FS decrease  
216 was observed in Tg210<sup>Doxy</sup> and WT<sup>Doxy</sup> mice upon MI.

217 **Figure S10**

218 **Masson trichrome staining of infarcted hearts.**

219 Representative Masson trichrome staining of WT<sup>Doxy</sup> and Tg210<sup>Doxy</sup> hearts 30 days after MI.  
220 Images were taken at the level of papillary muscles. Magnification 25x, calibration bar 1000  
221  $\mu$ m.

222 **Figure S11**

223 **Schematic representation of Matrigel plug experimental plan.** C57Bl/6N mice were  
224 divided into two groups and treated with ANTI-210 or SCR oligonucleotides (day -2).  
225 Matrigel loaded with VEGF and FGF pro-angiogenic factors was injected subcutaneously 2  
226 days later (day 0). After 5 days, Matrigel plug implanted mice received a second dose of  
227 LNA-oligonucleotides (day 5). At day 7, mice were sacrificed and Matrigel plugs were  
228 processed for paraffin inclusion and sectioning. To analyze the efficacy of ANTI-210  
229 treatment, skin and adductor muscles were snap-frozen for RNA extraction and miRNA  
230 quantification by qPCR.

231 **Figure S12**

232 **ANTI-210 efficiently inhibits miR-210 in skin and adductor muscle of mice implanted**  
233 **with Matrigel.** The bar graph shows miR-210 levels after miR-210 blocking, measured by  
234 qPCR in skin and in adductor muscles and expressed as fold induction versus SCR samples  
235 (n=9-10; #P=0.0001).

236

237 **References**

238 1. Zaccagnini G, Maimone B, Fuschi P, Maselli D, Spinetti G, Gaetano C, Martelli F.  
239 Overexpression of miR-210 and its significance in ischemic tissue damage. *Sci Rep.* 2017; 7:  
240 9563-017-09763-4.

241 2. Zaccagnini G, Palmisano A, Canu T, Maimone B, Lo Russo FM, Ambrogi F, Gaetano C,  
242 De Cobelli F, Del Maschio A, Esposito A, Martelli F. Magnetic Resonance Imaging Allows  
243 the Evaluation of Tissue Damage and Regeneration in a Mouse Model of Critical Limb  
244 Ischemia. *PLoS One*. 2015; 10: e0142111.

245 3. Di Stefano V, Cencioni C, Zaccagnini G, Magenta A, Capogrossi MC, Martelli F. p66ShcA  
246 modulates oxidative stress and survival of endothelial progenitor cells in response to high  
247 glucose. *Cardiovasc Res*. 2009; 82: 421-429.

248

249

**FIG. S1**

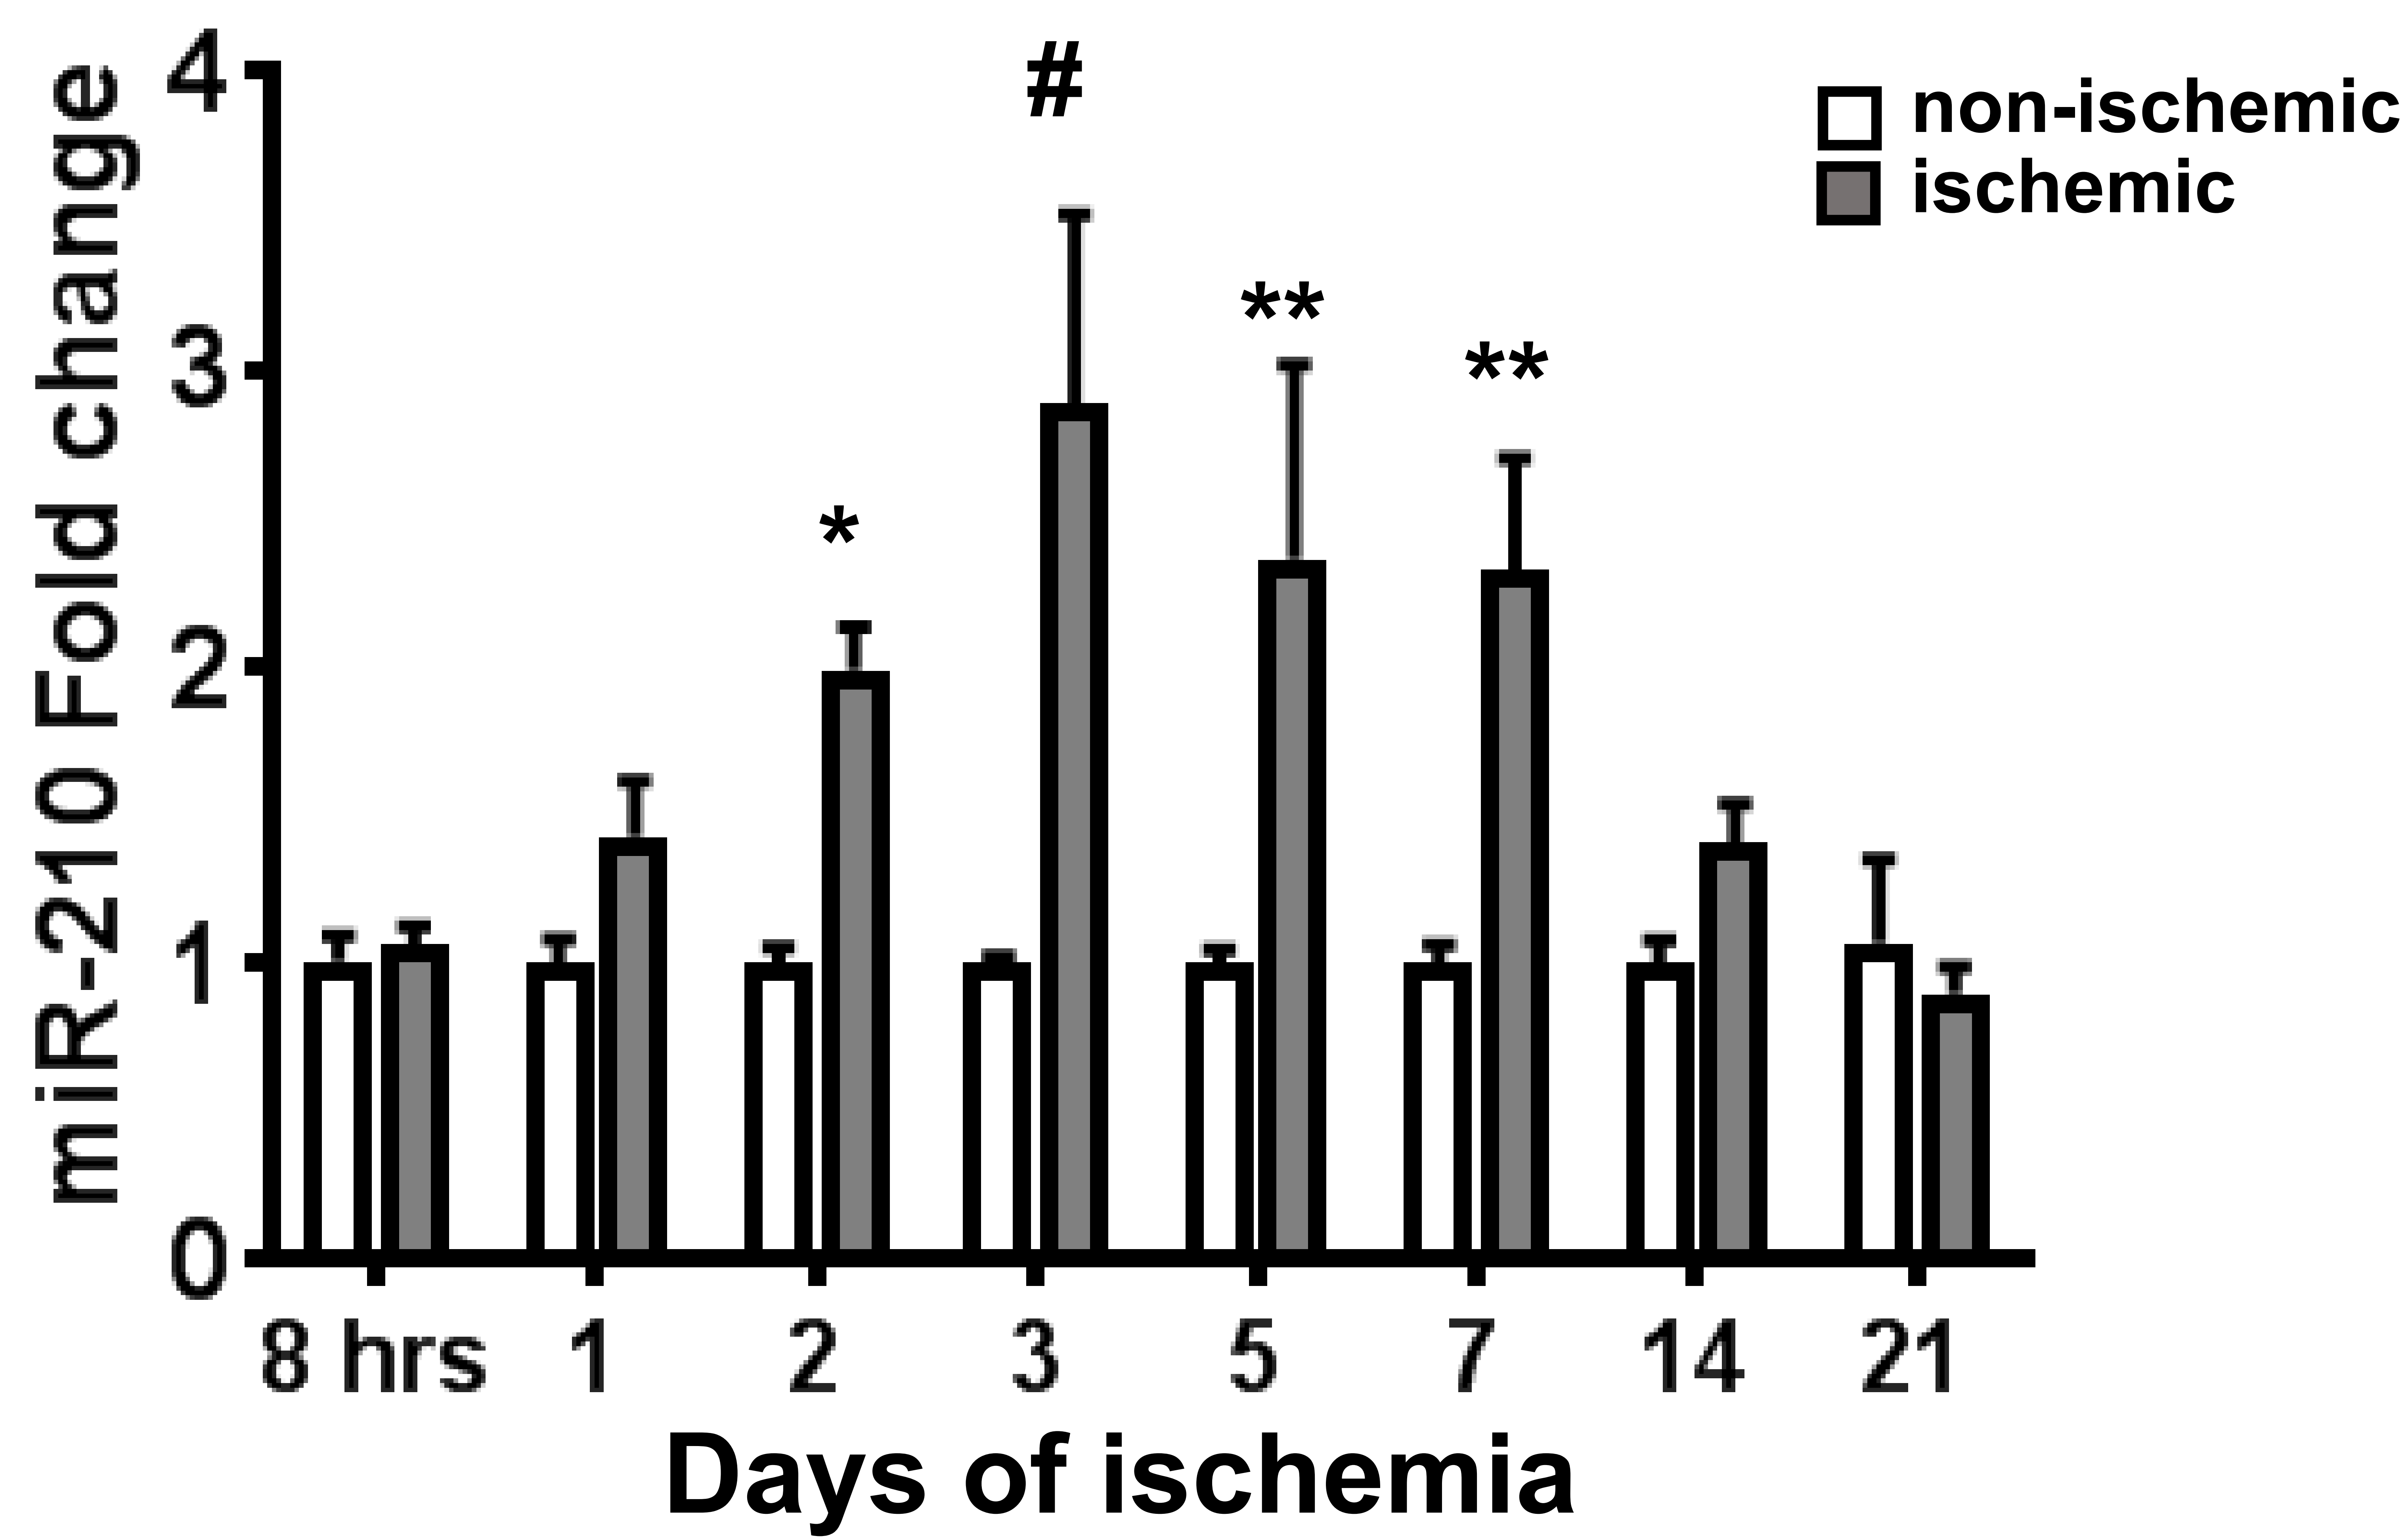

**FIG. S2**

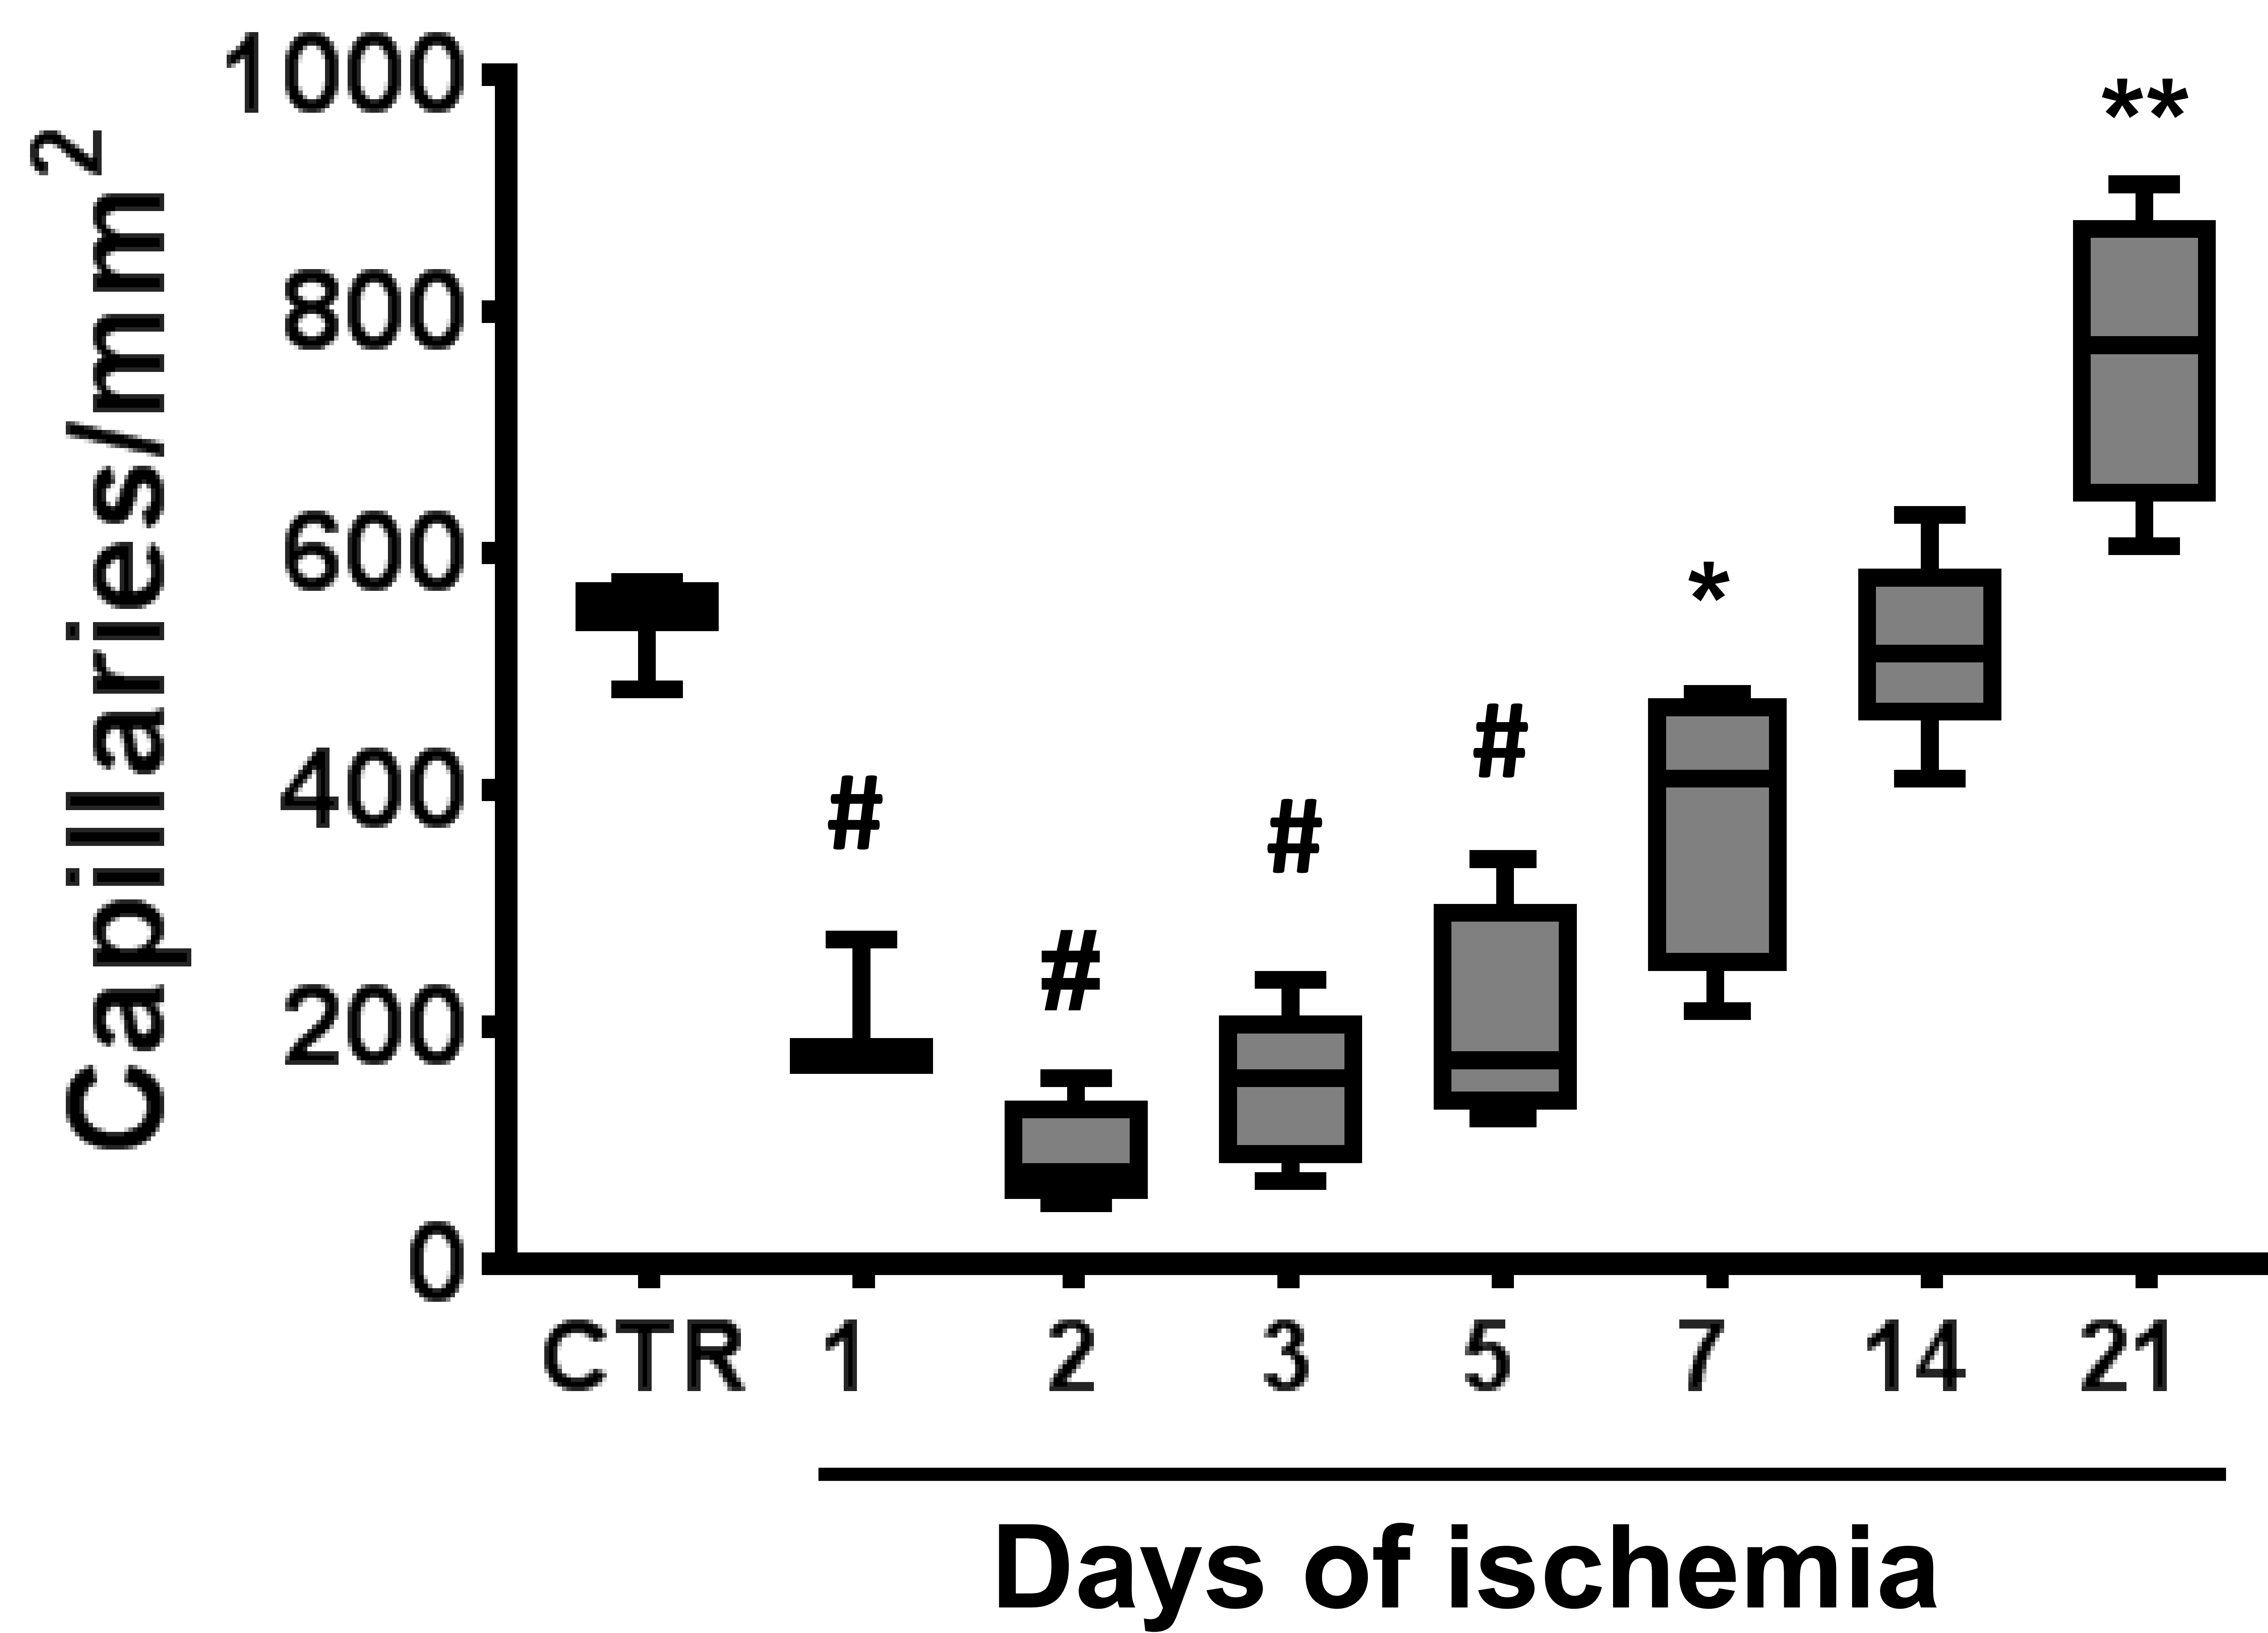

**FIG. S3**

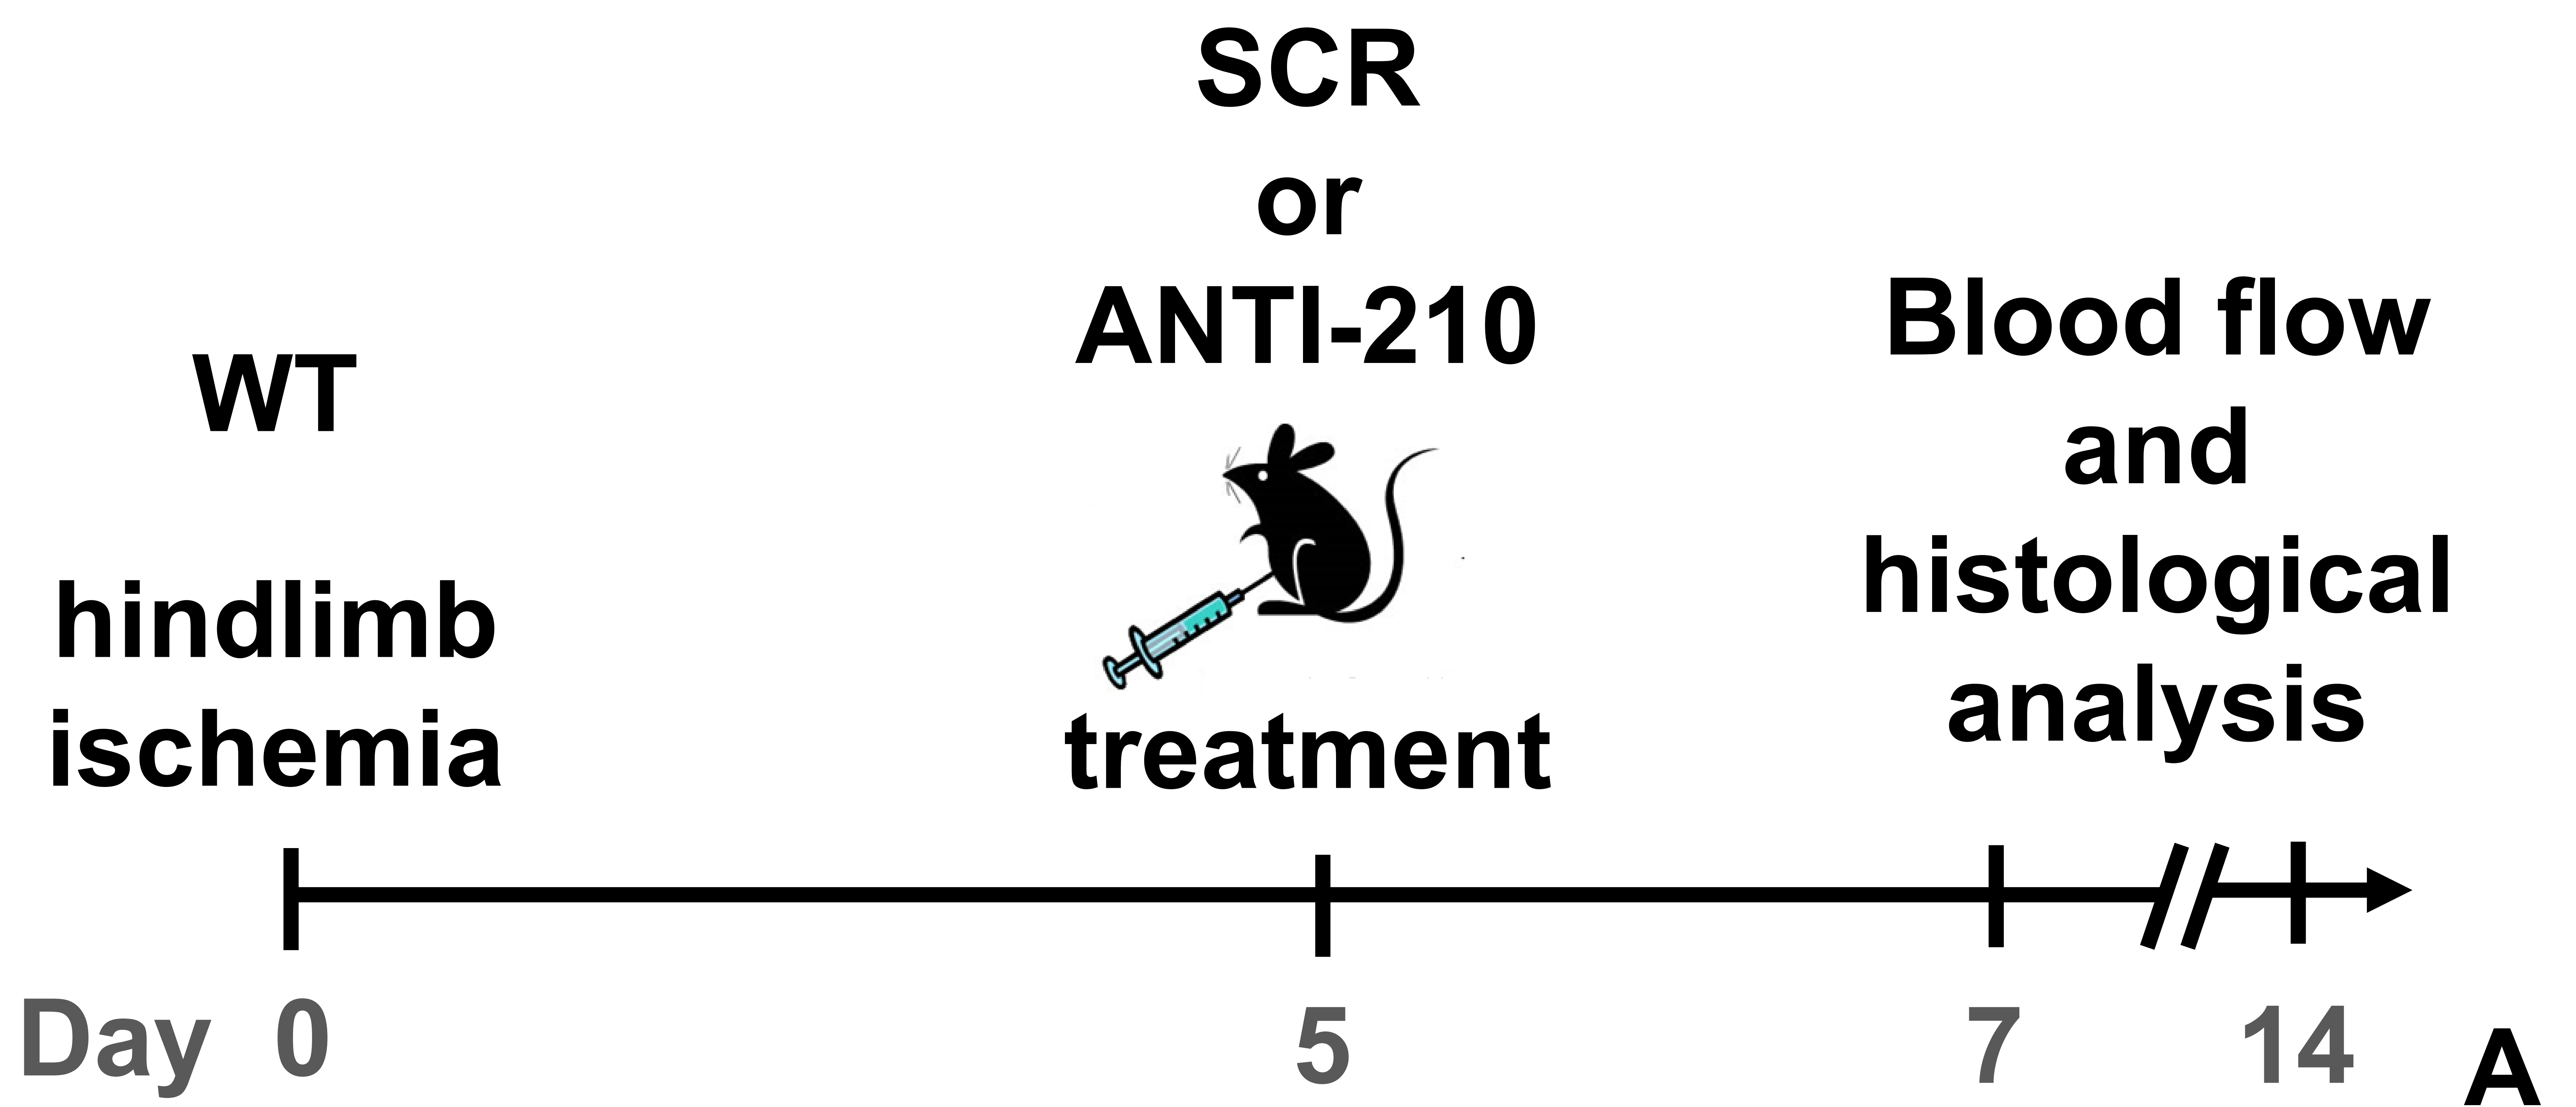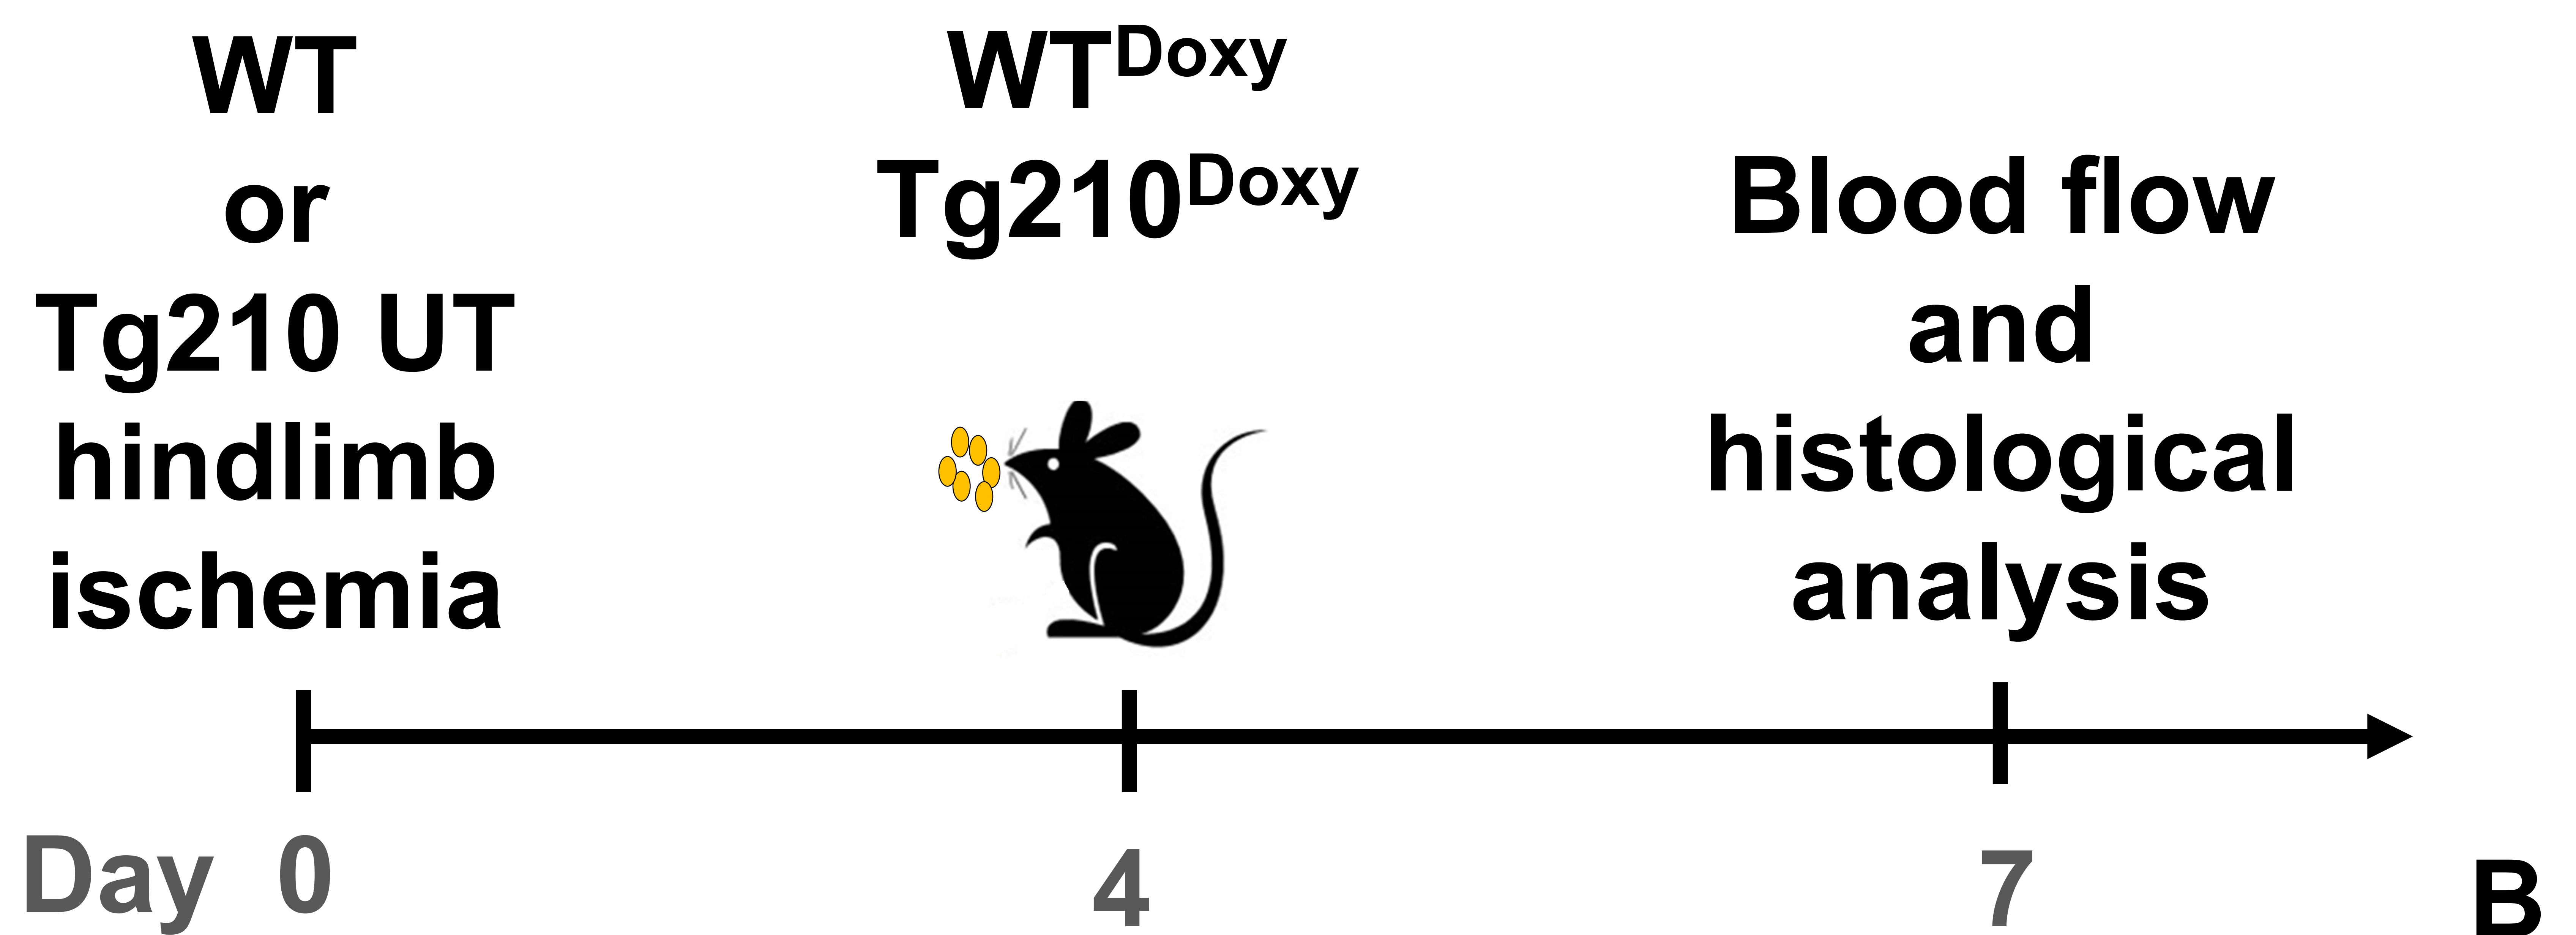

**FIG.S4**

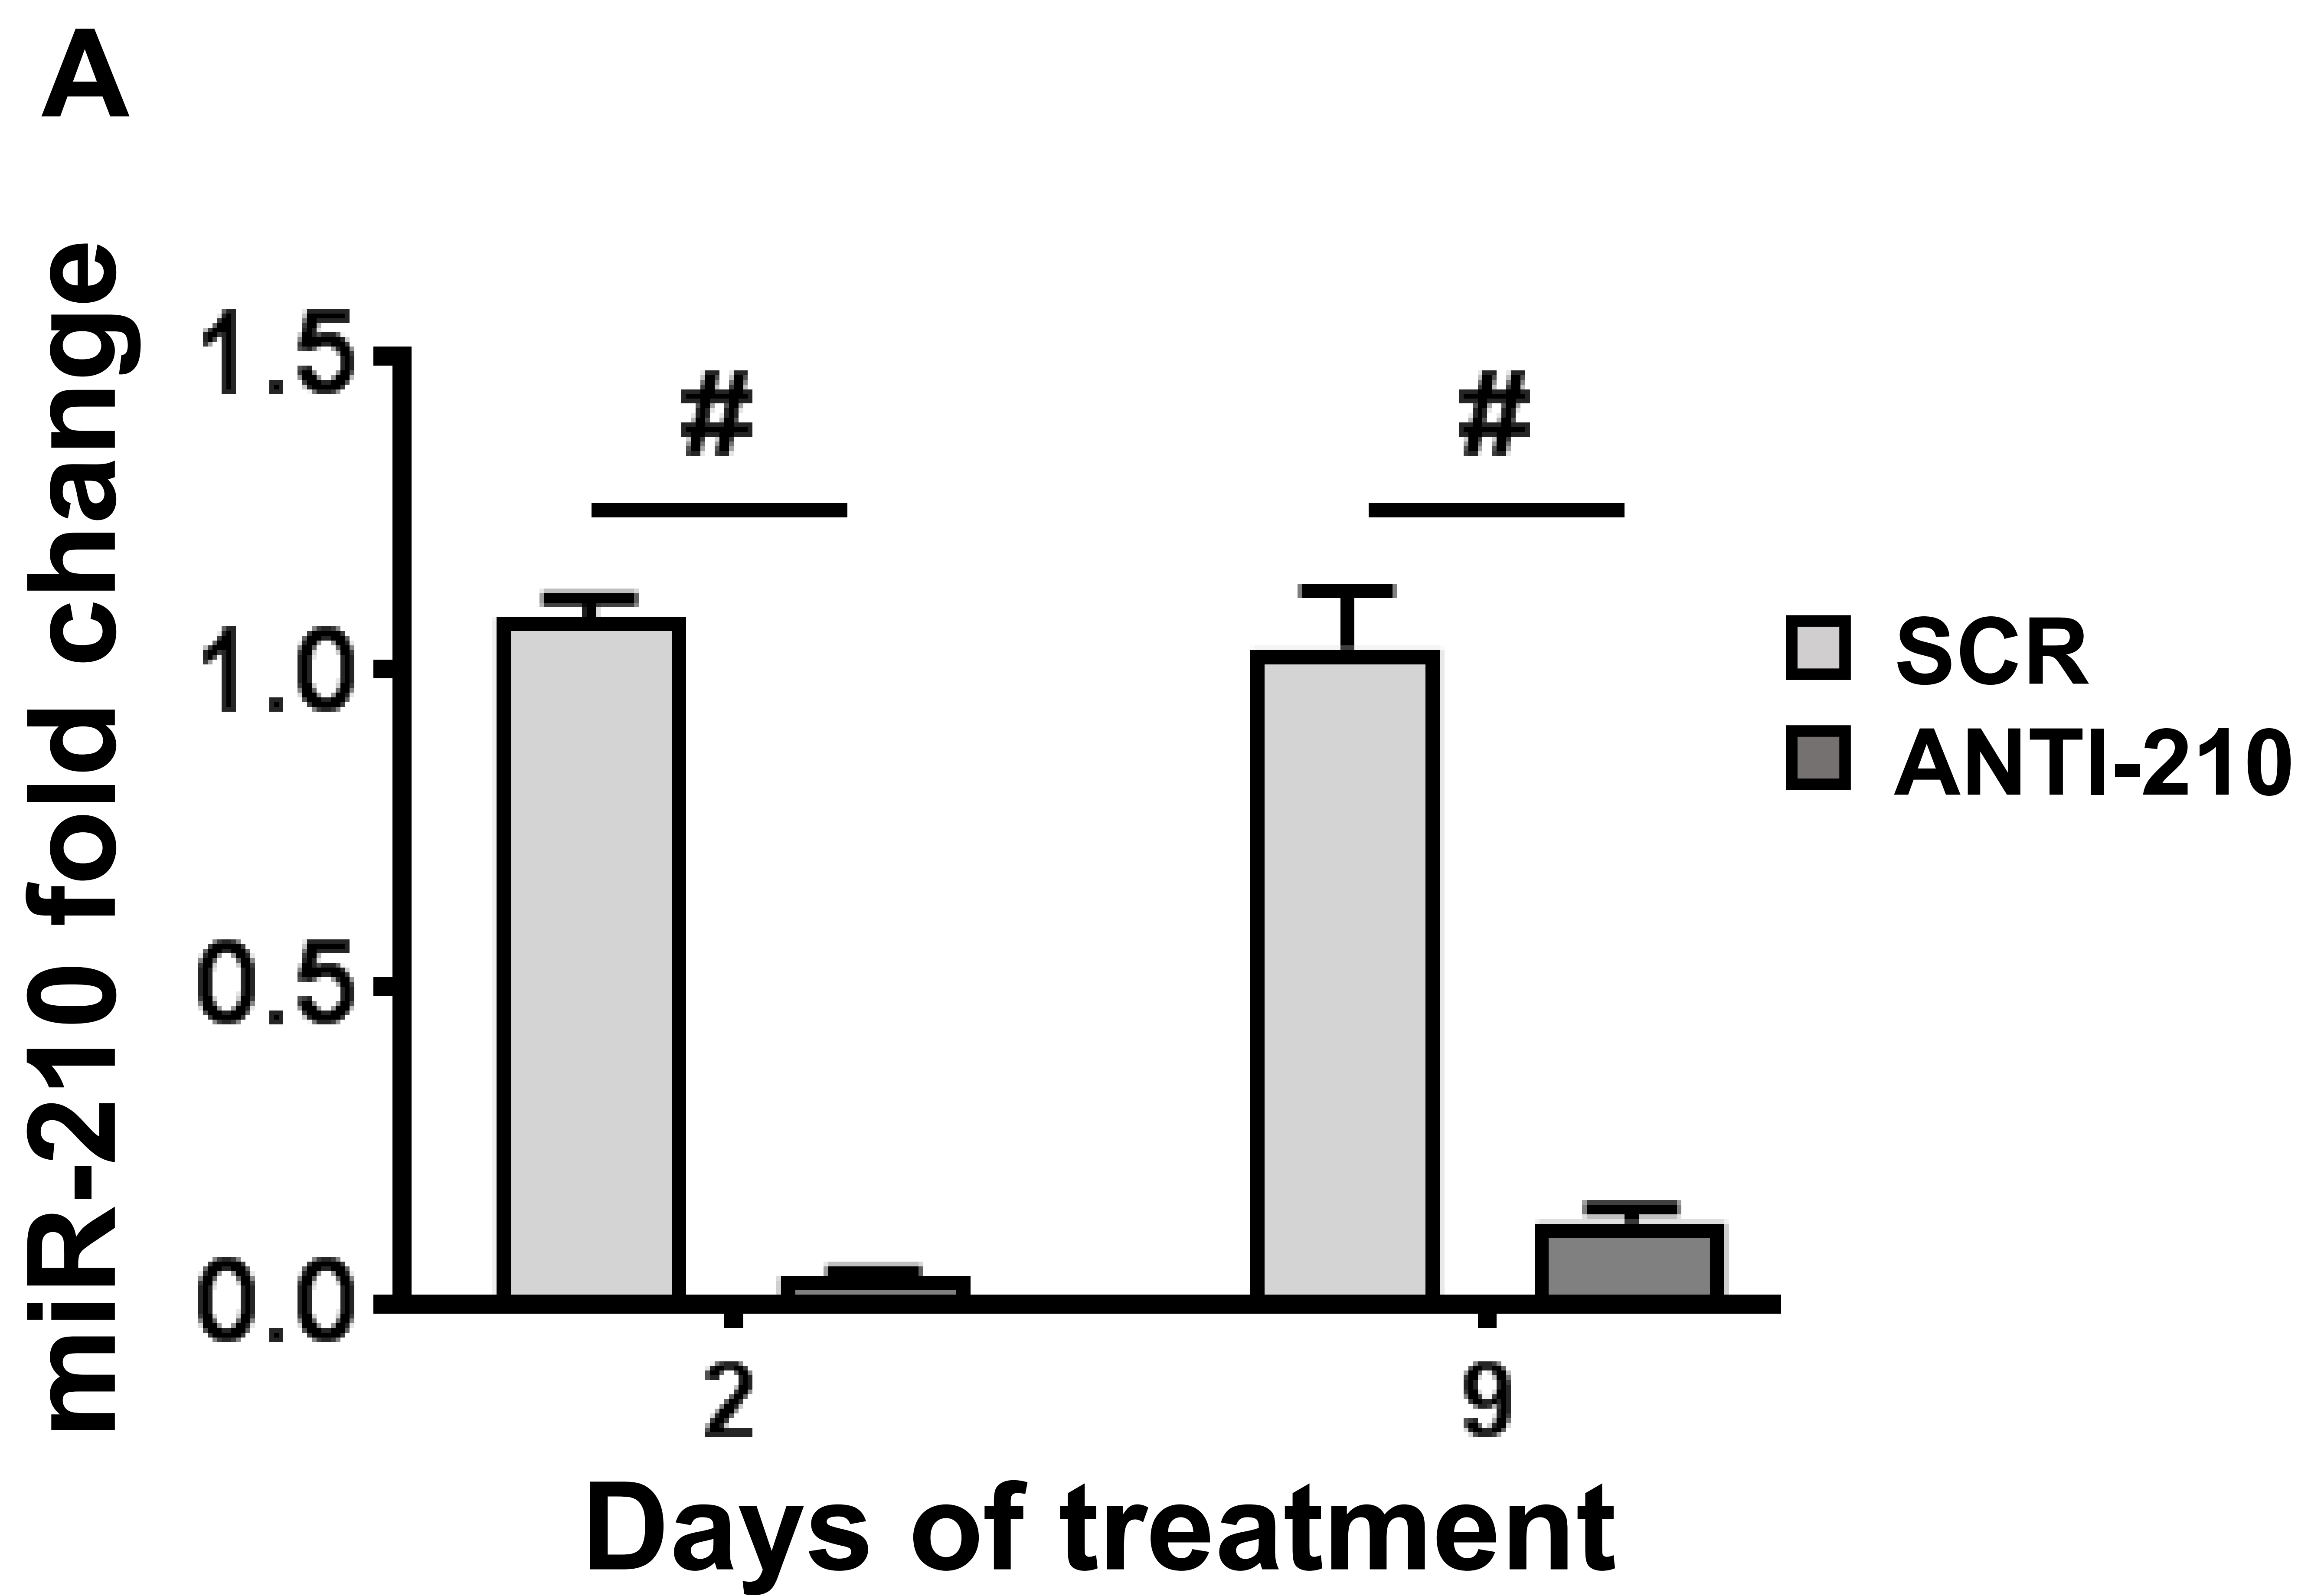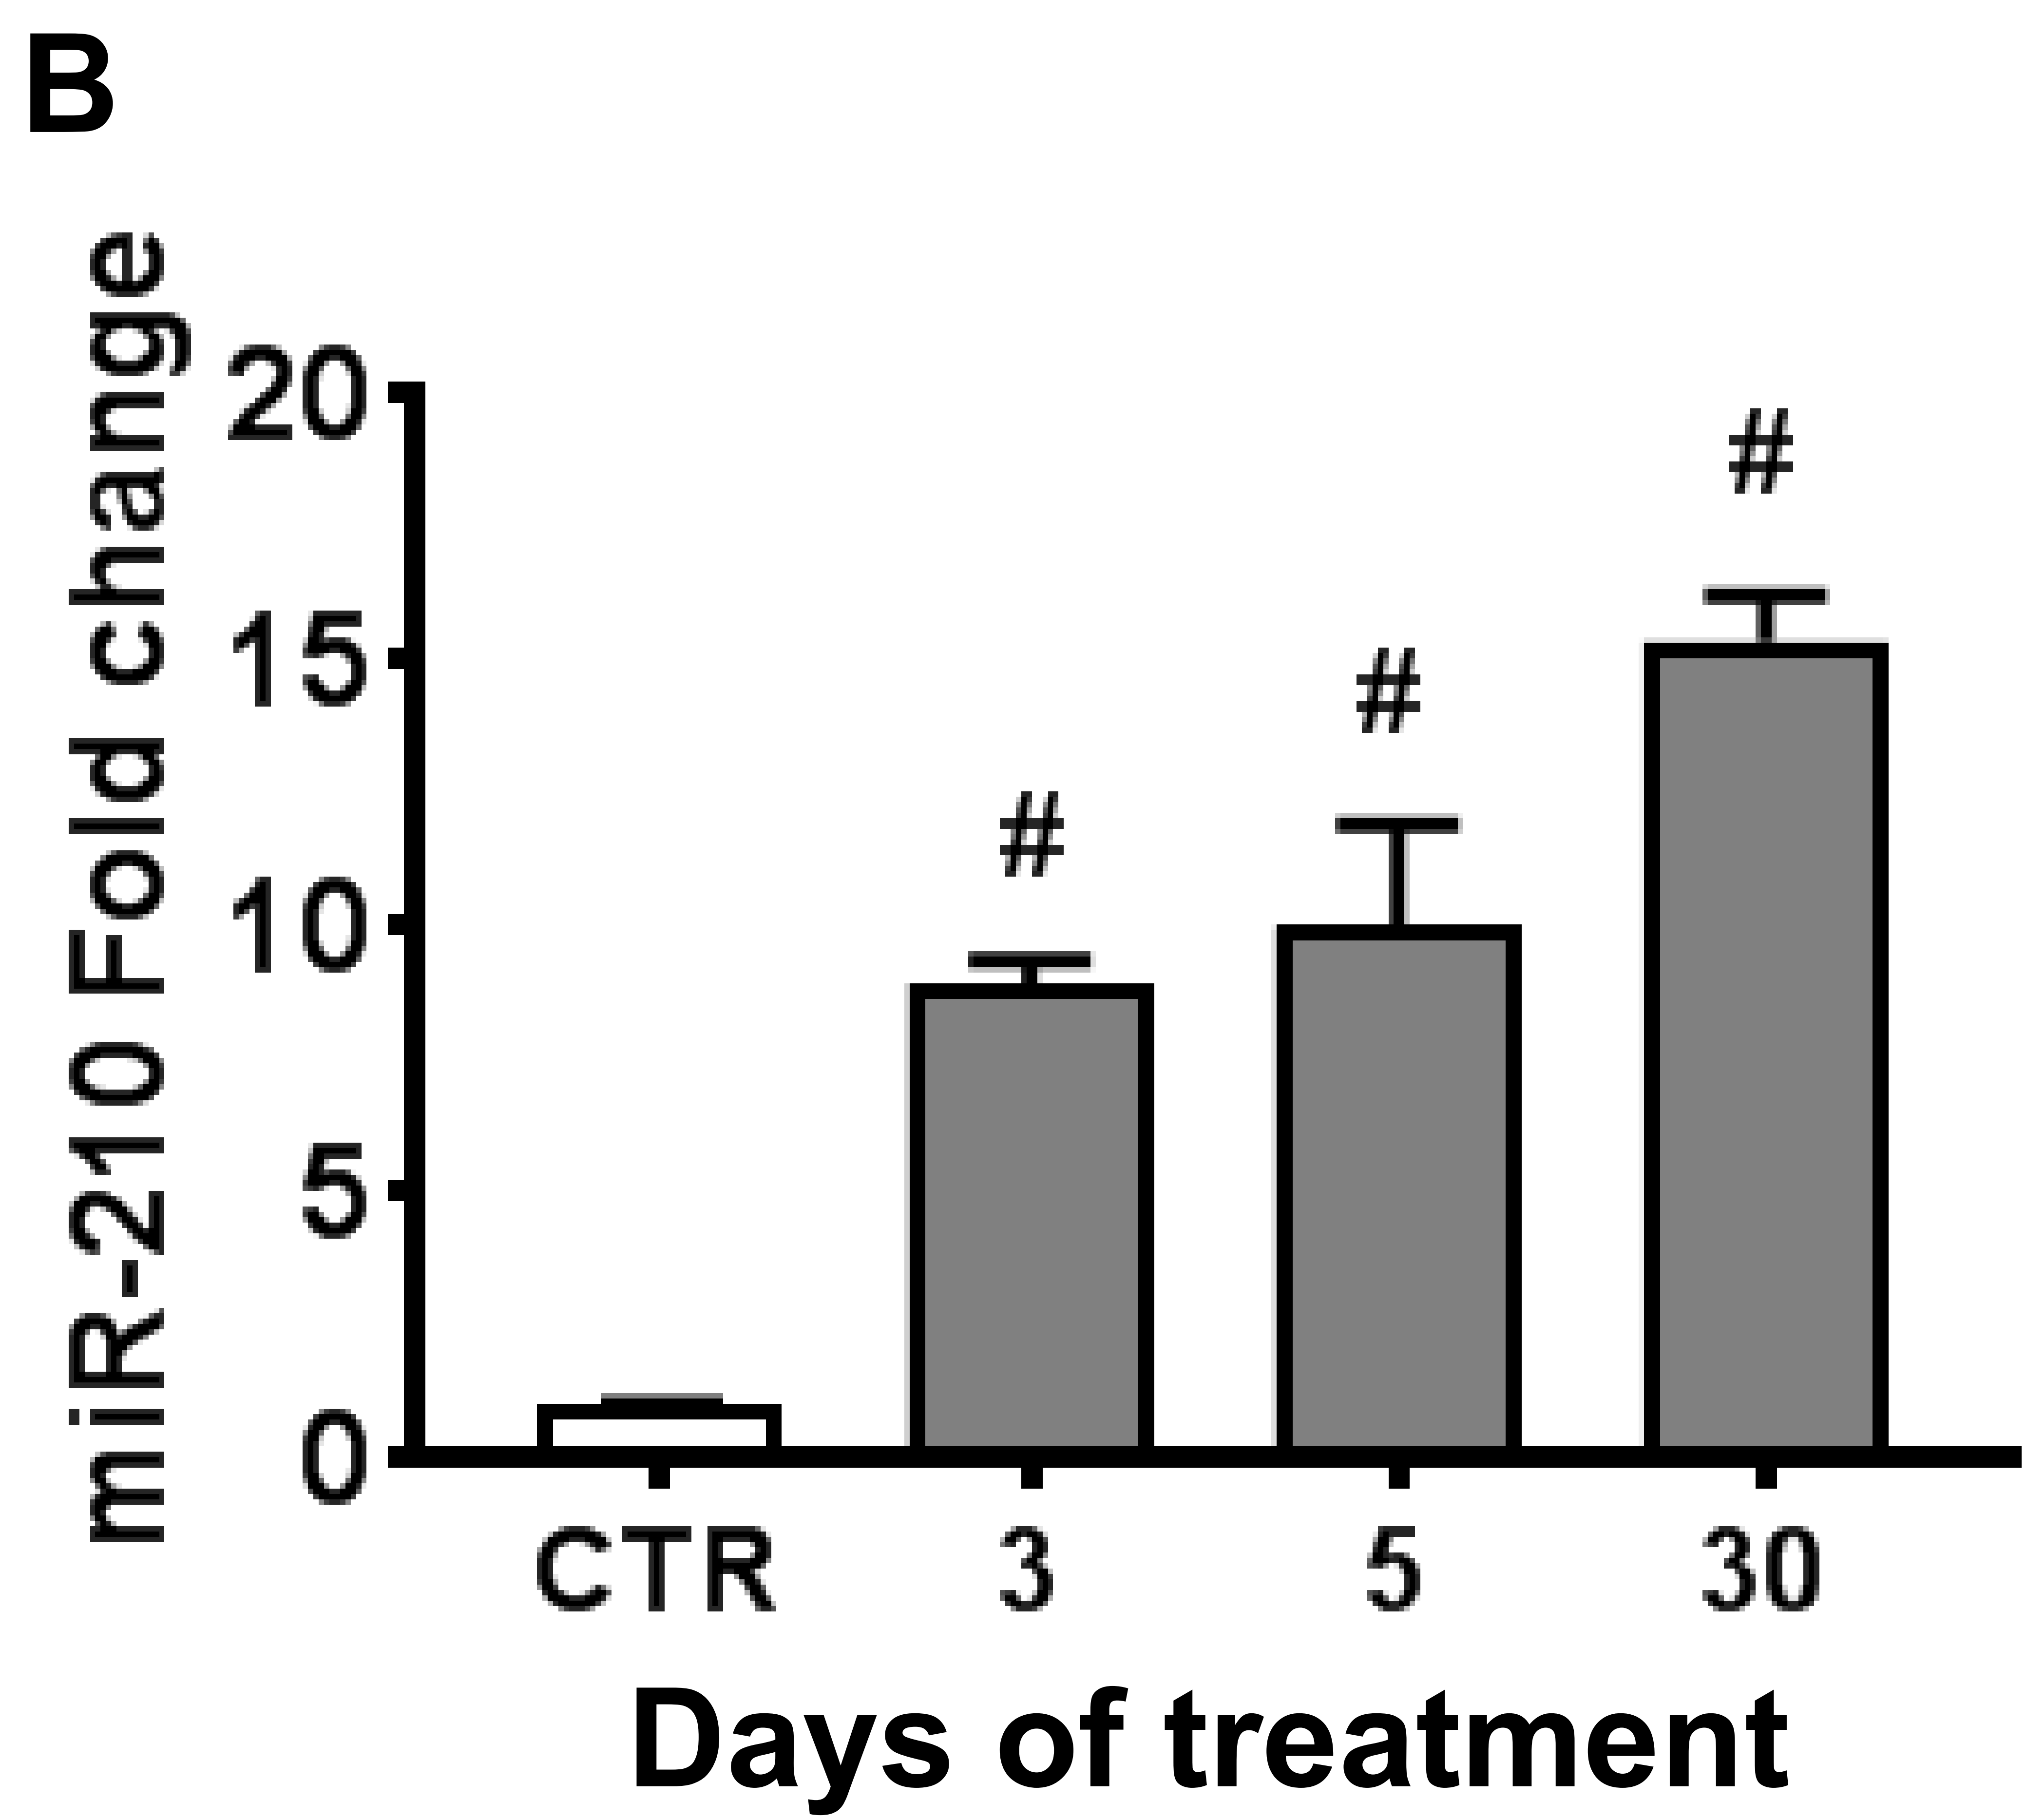

FIG.S5

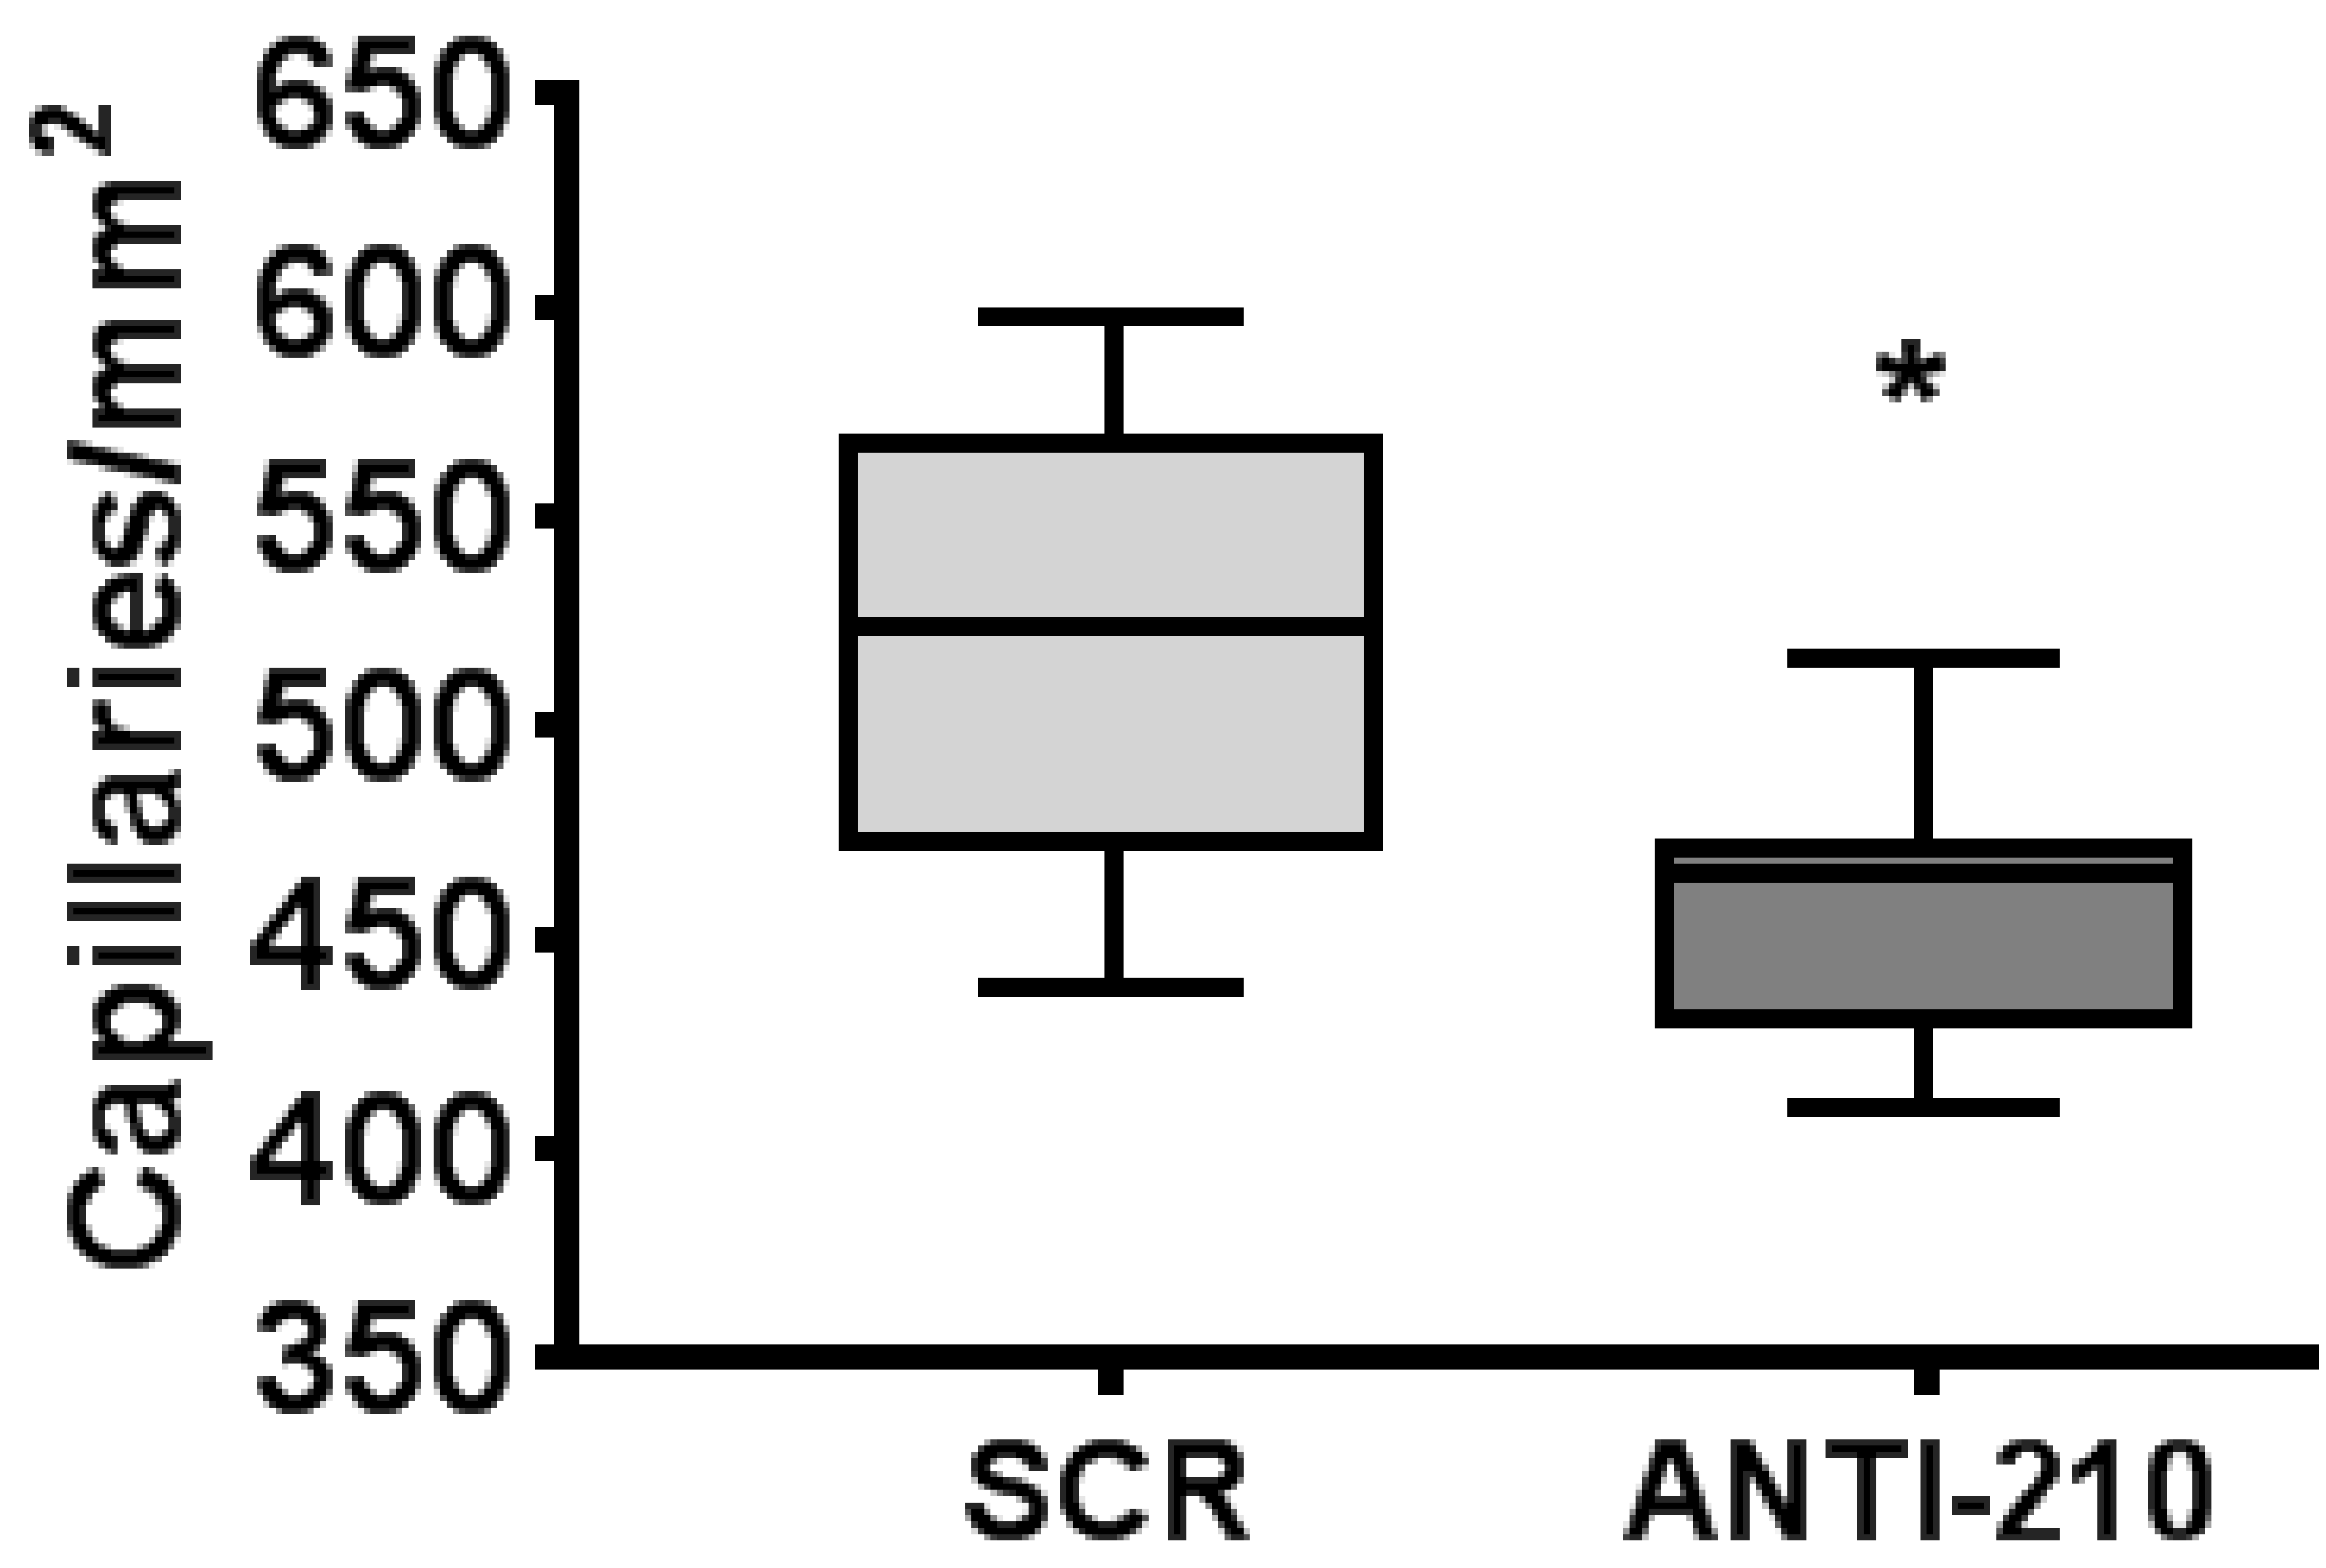

Figure S6

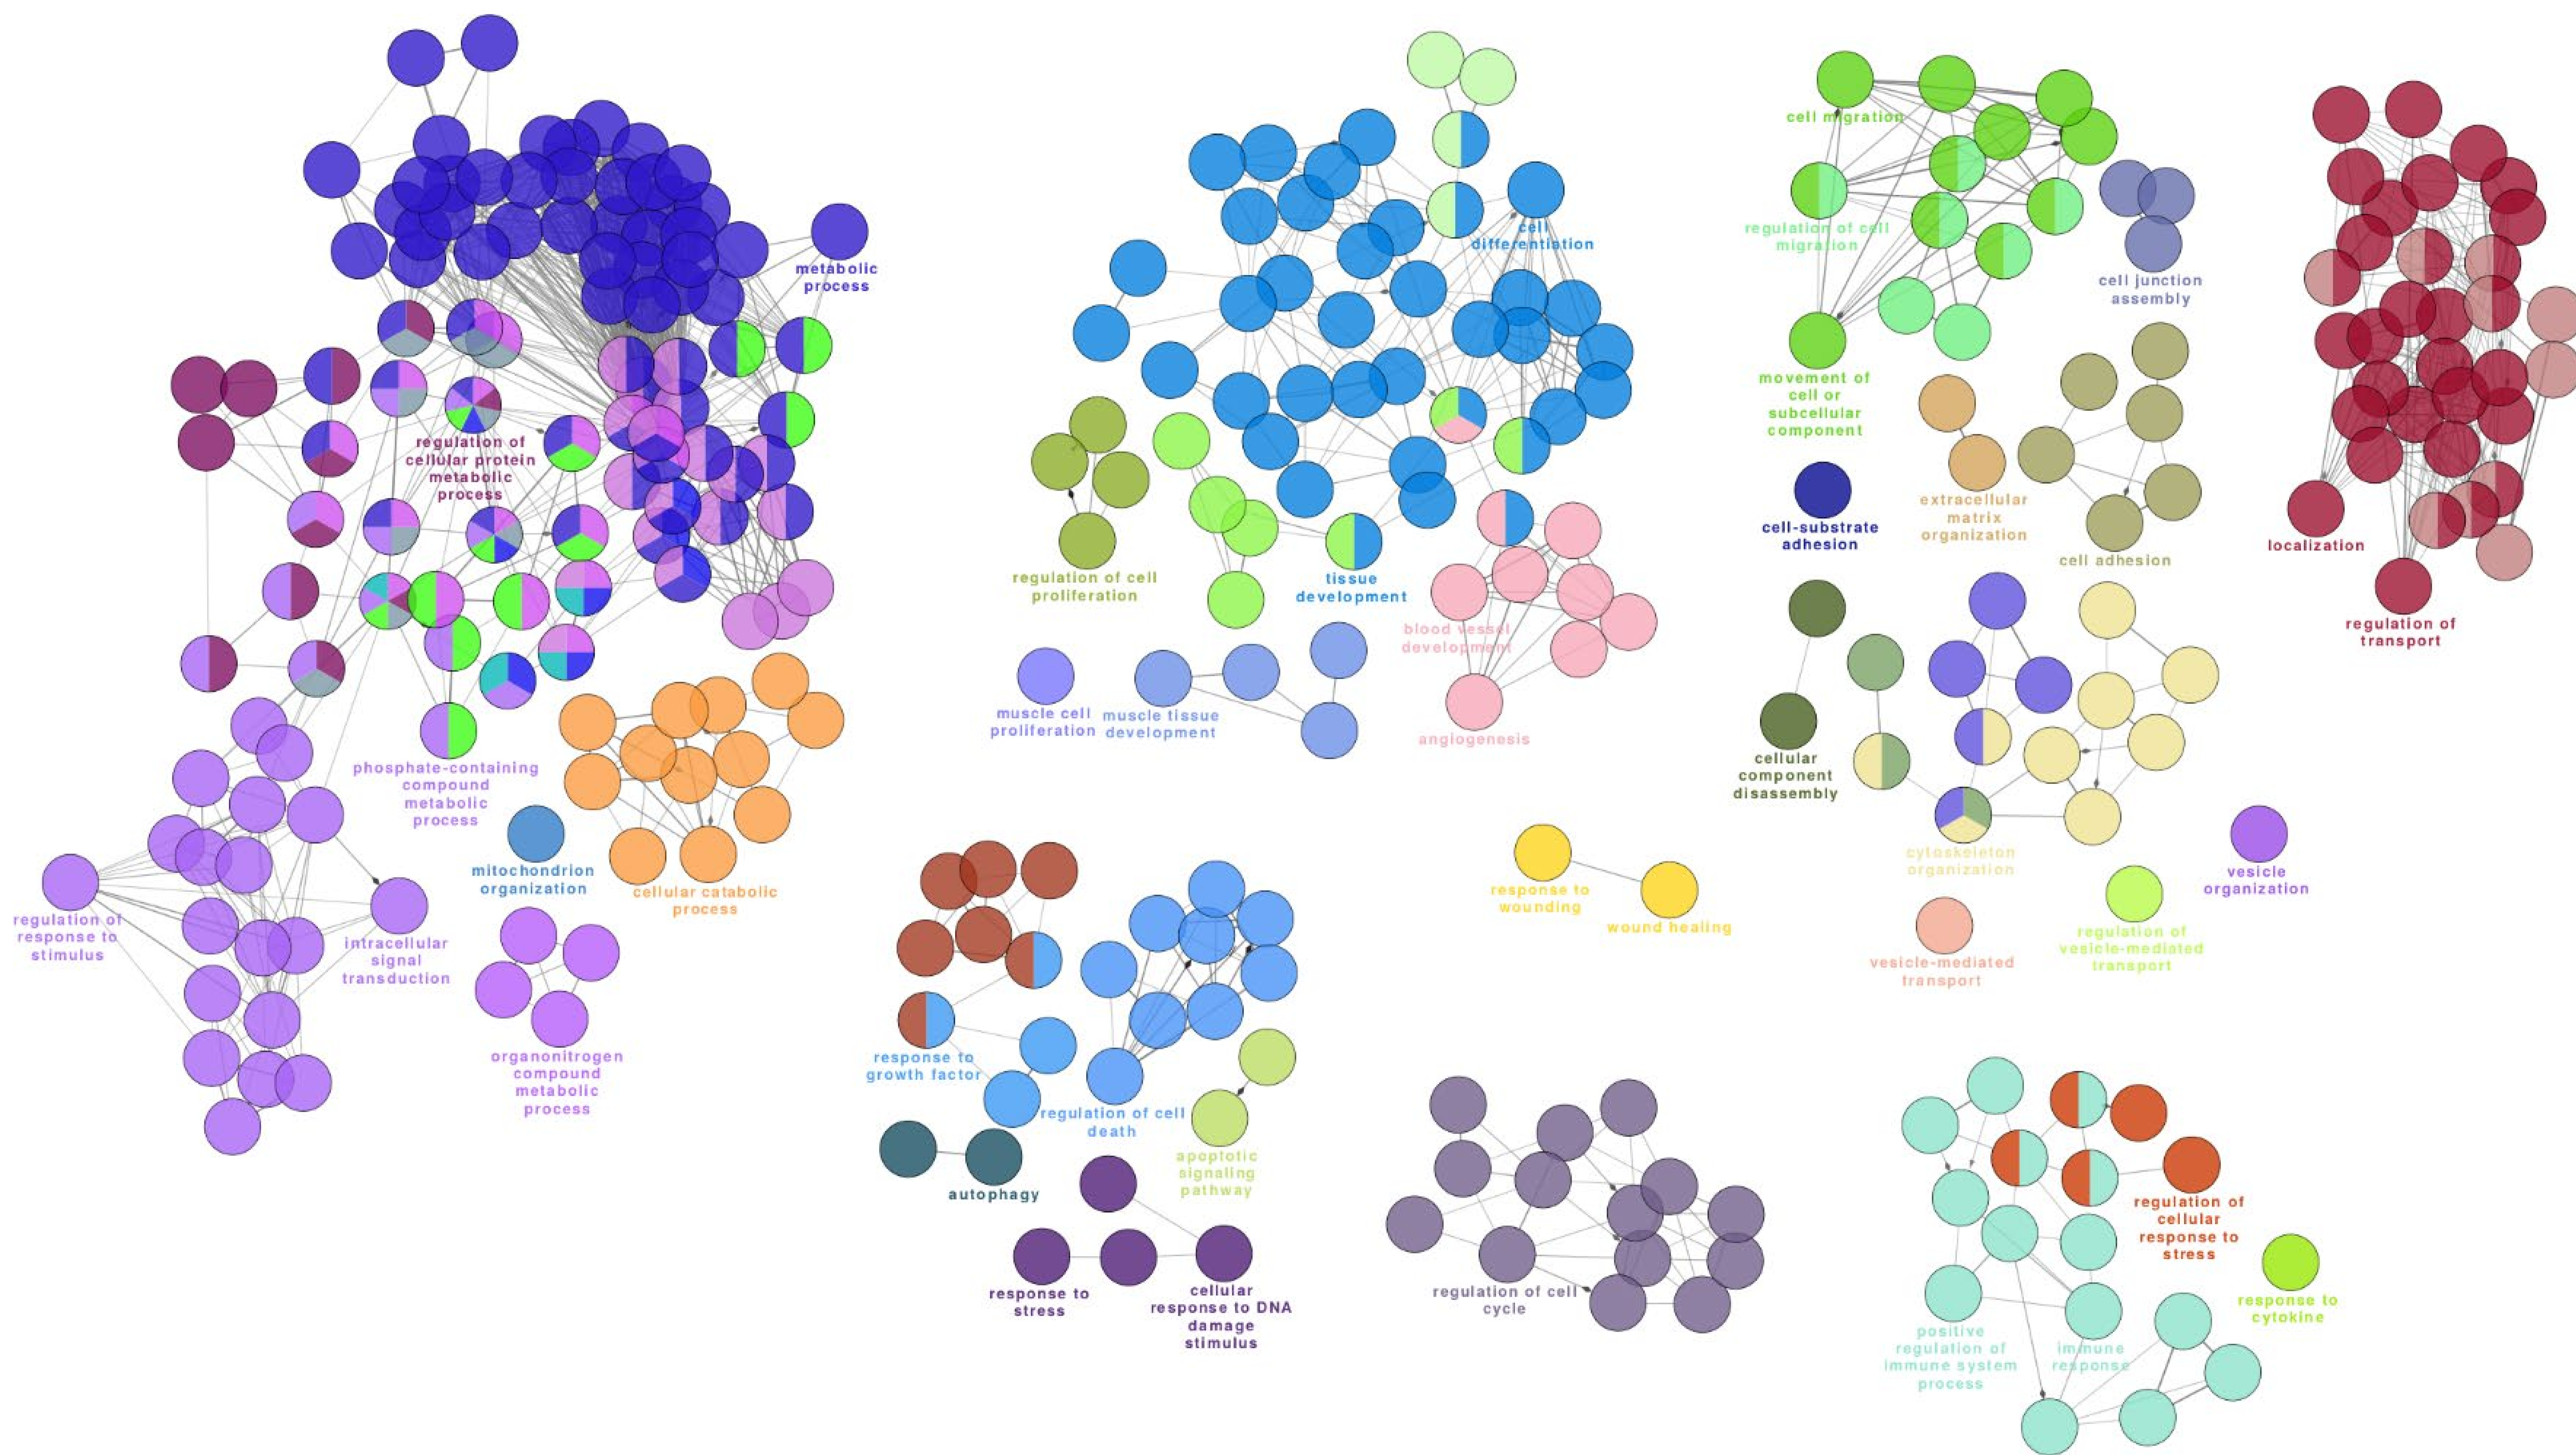

FIG. S7

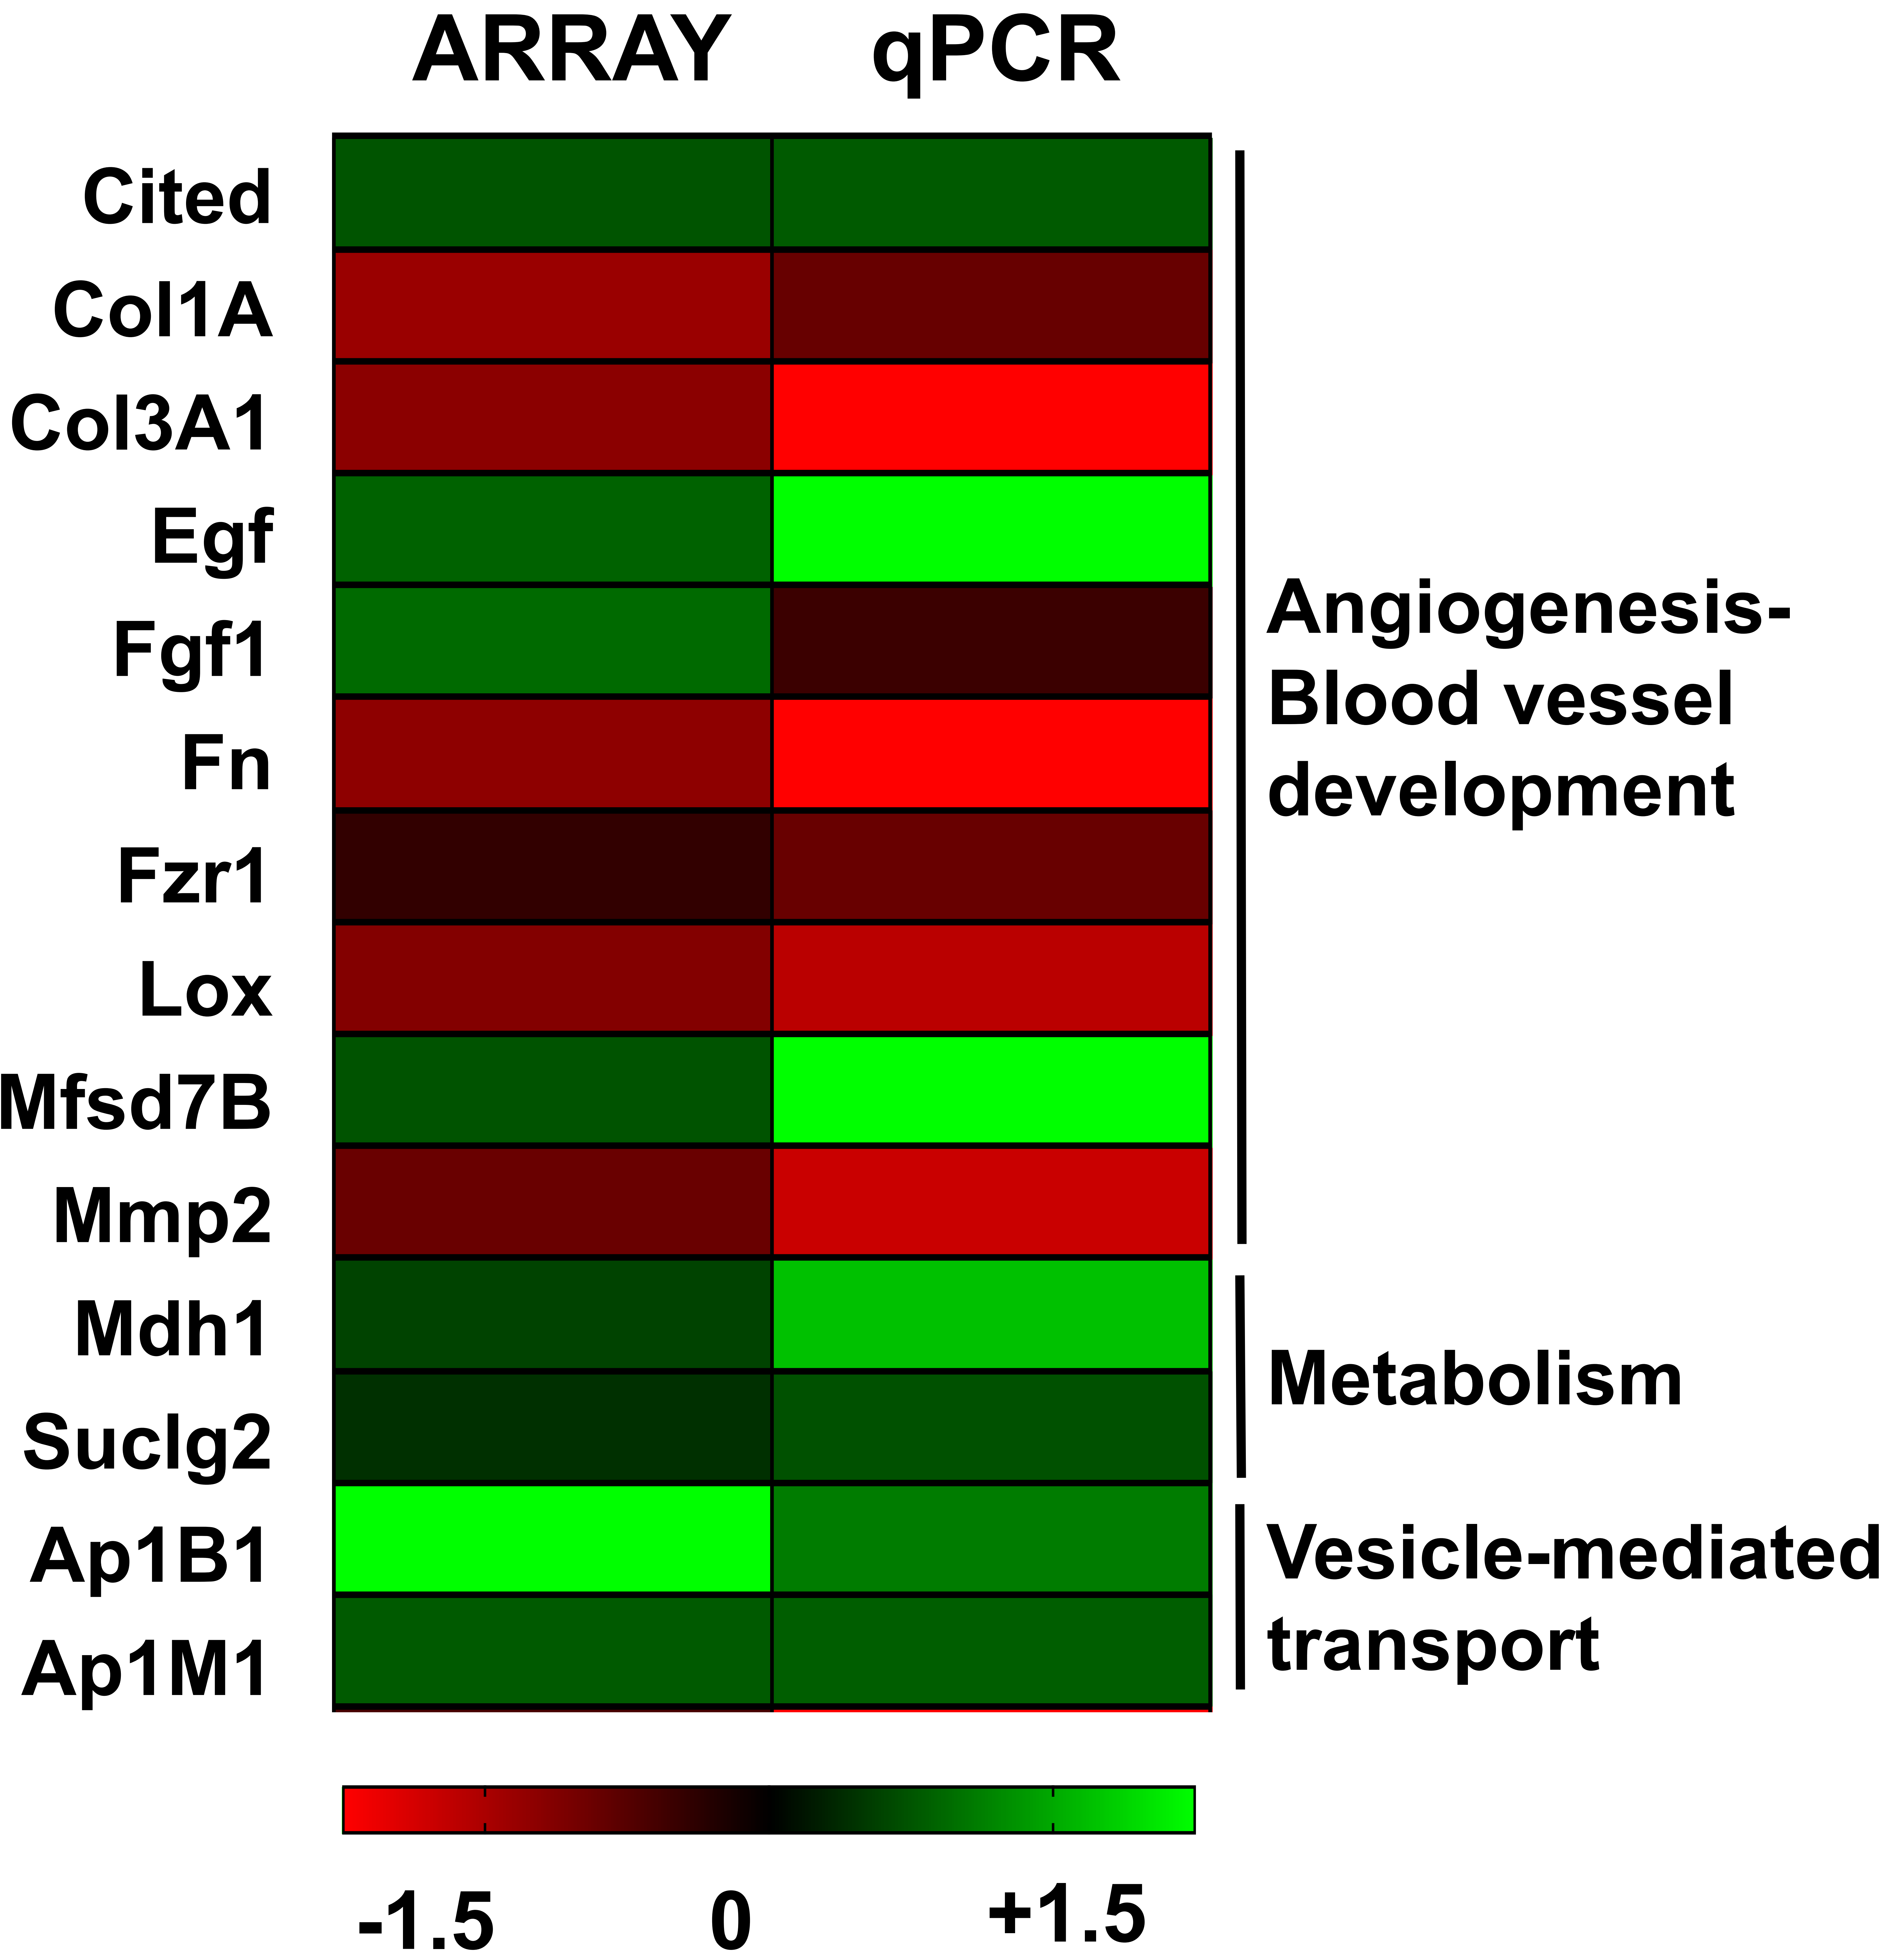

**FIG. S8**

**A**

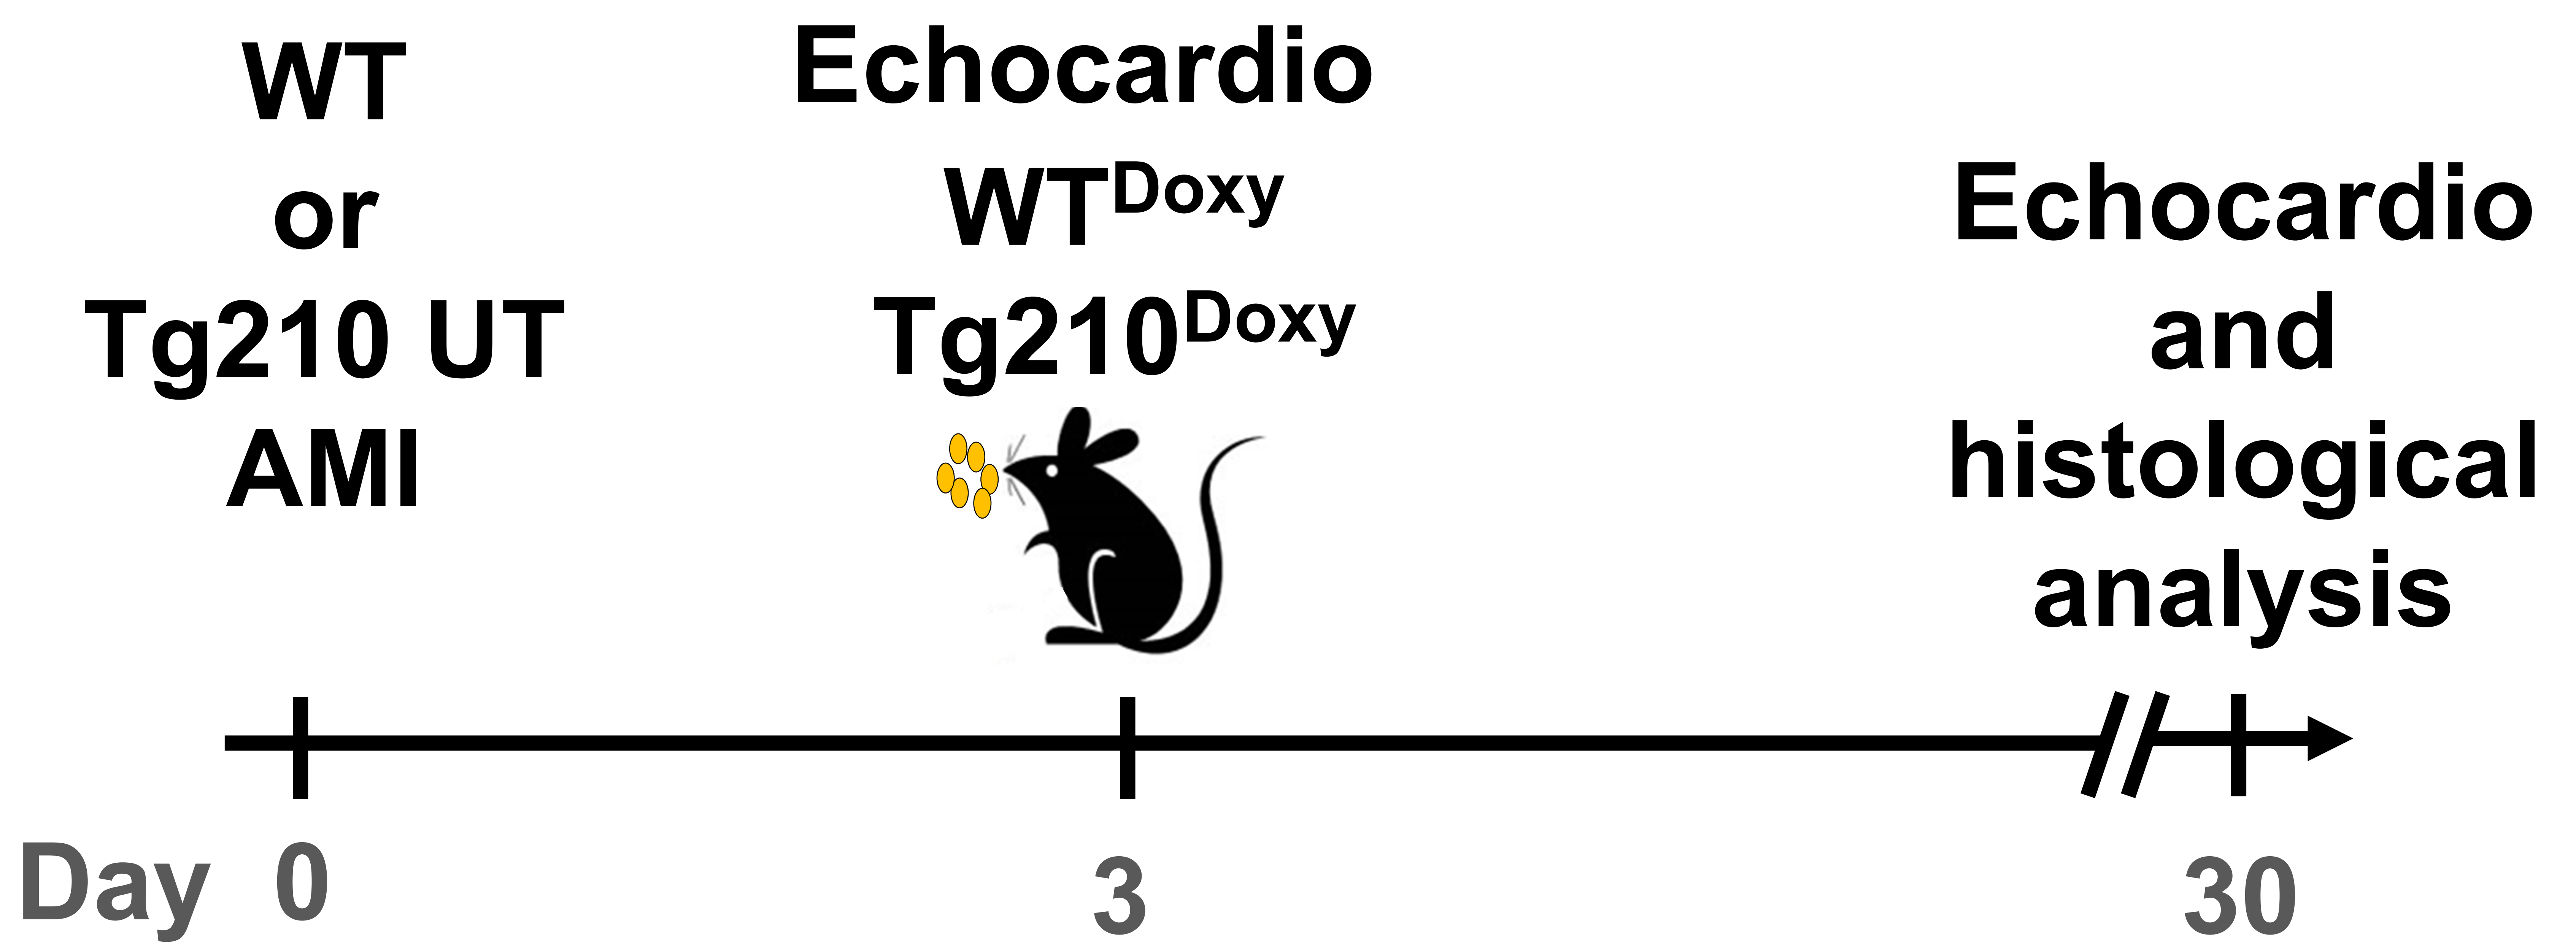

**B**

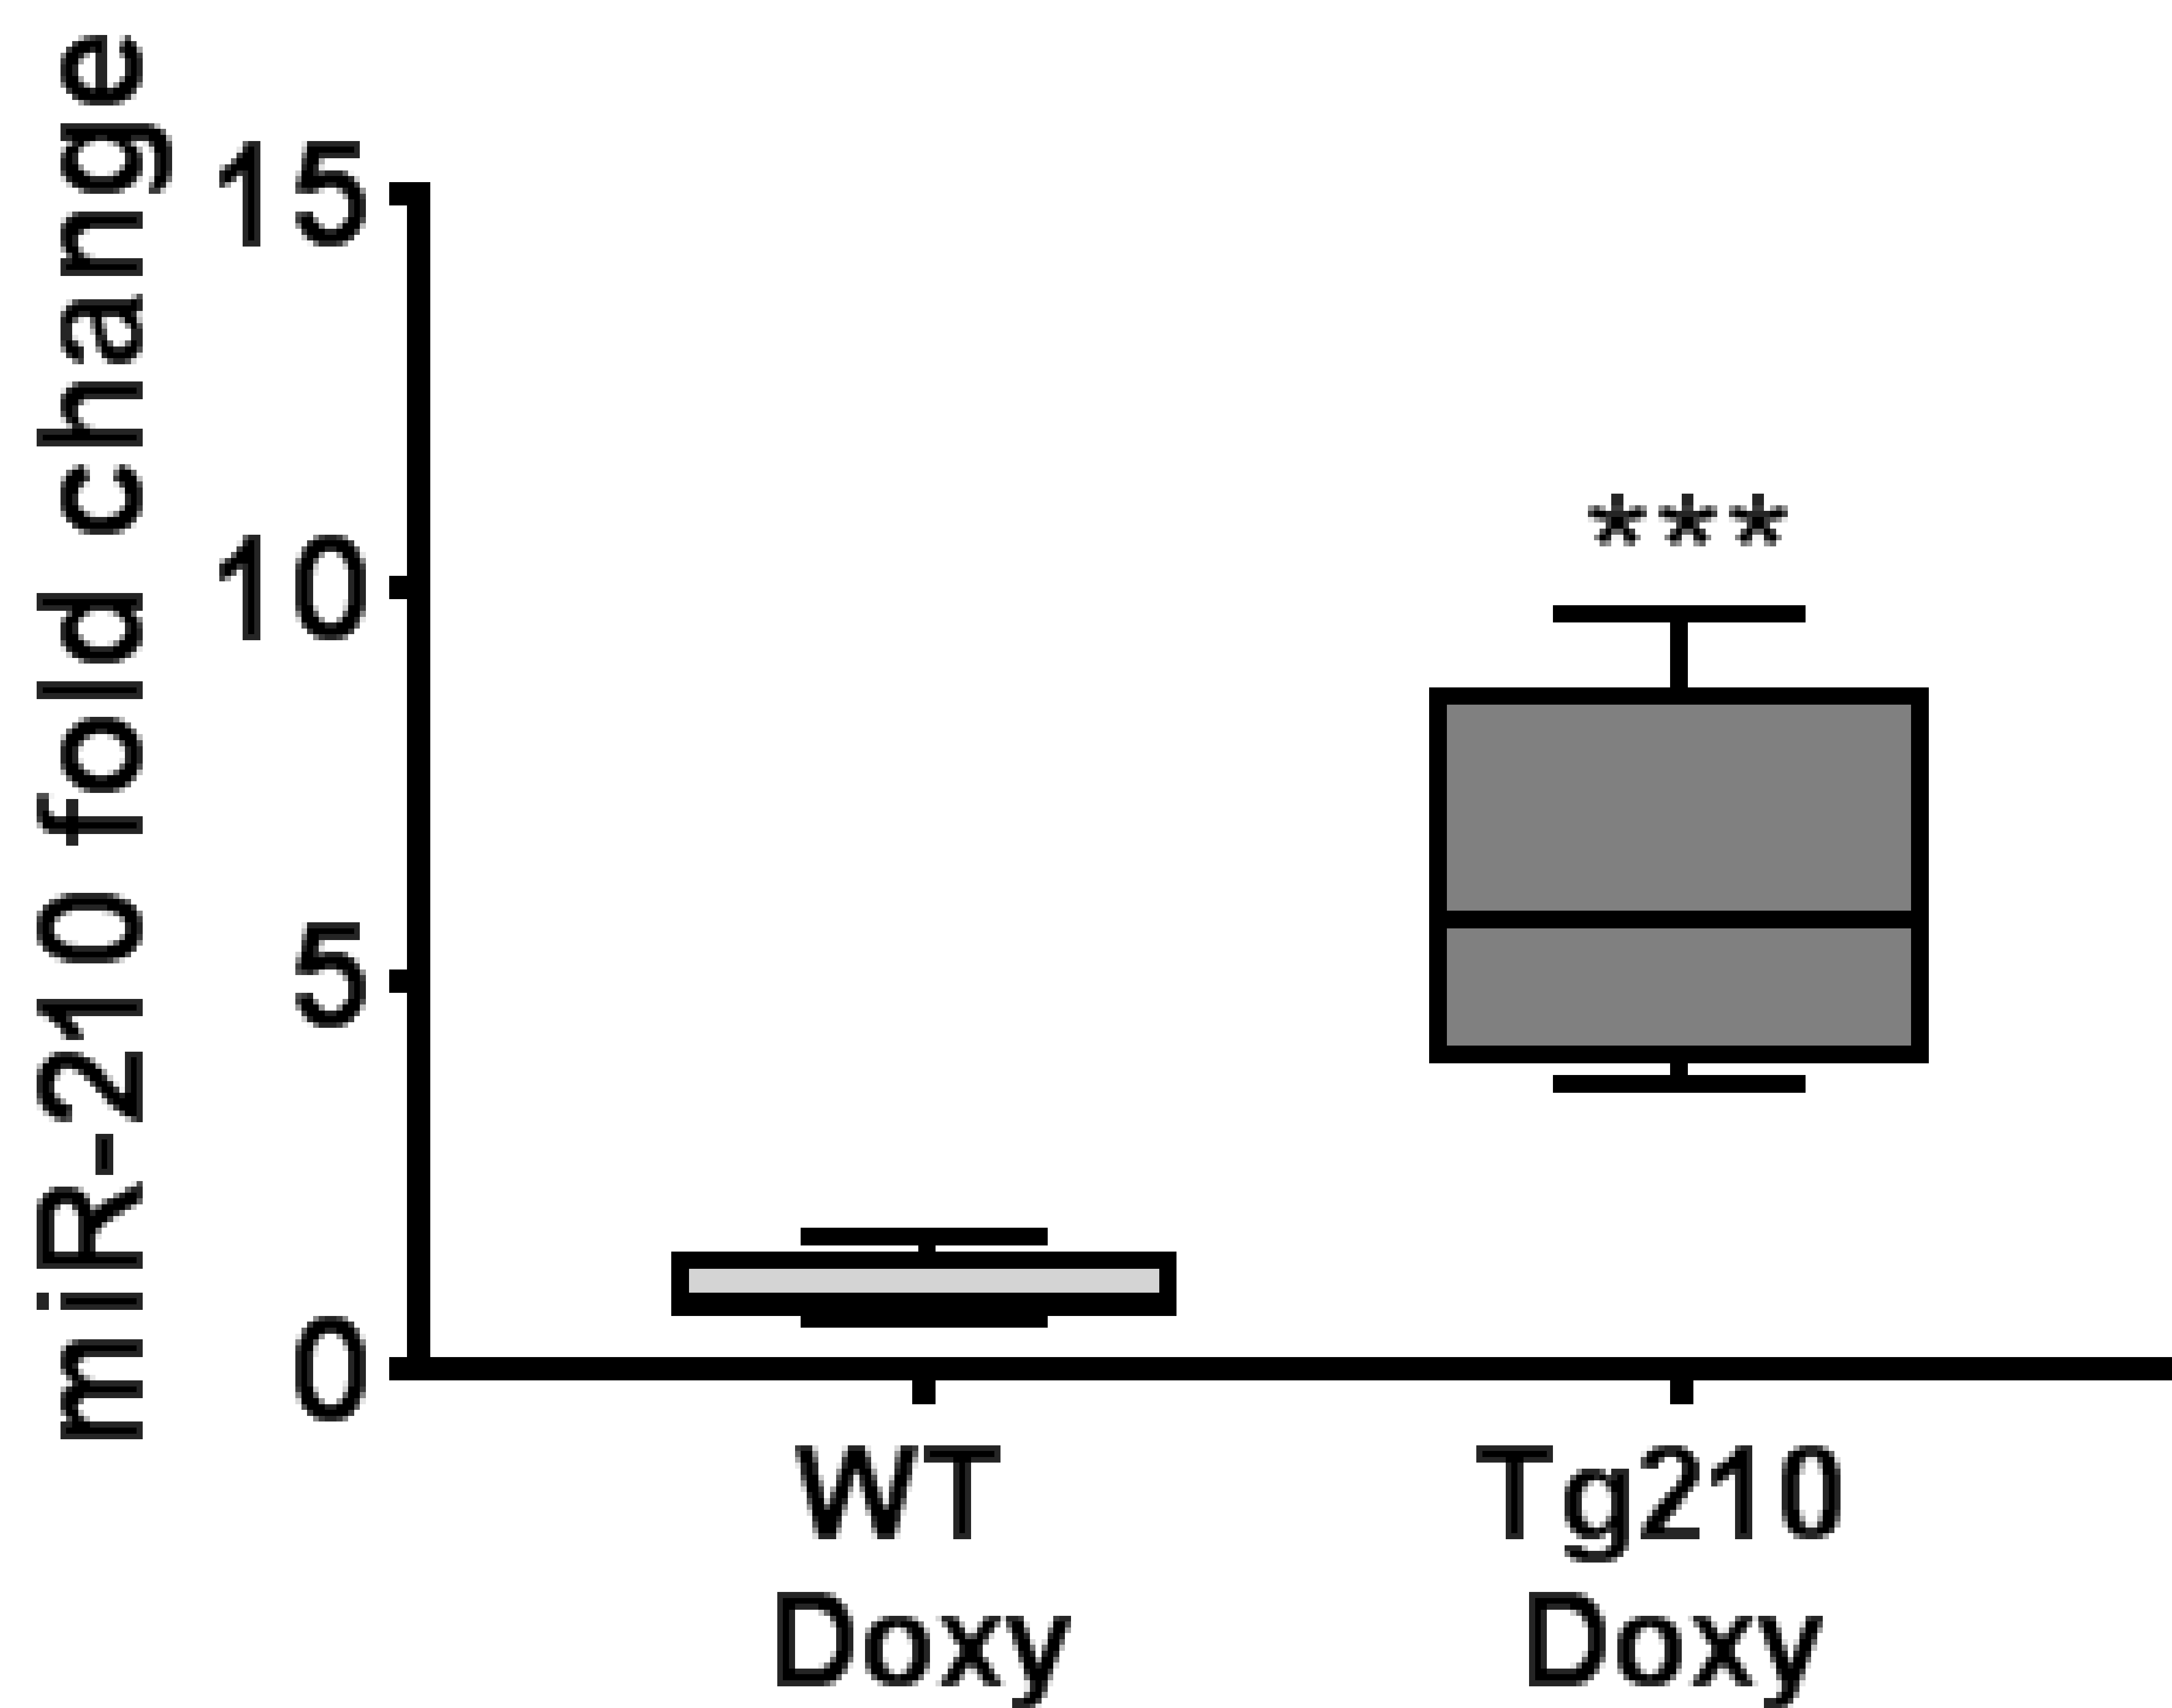

FIG. S9

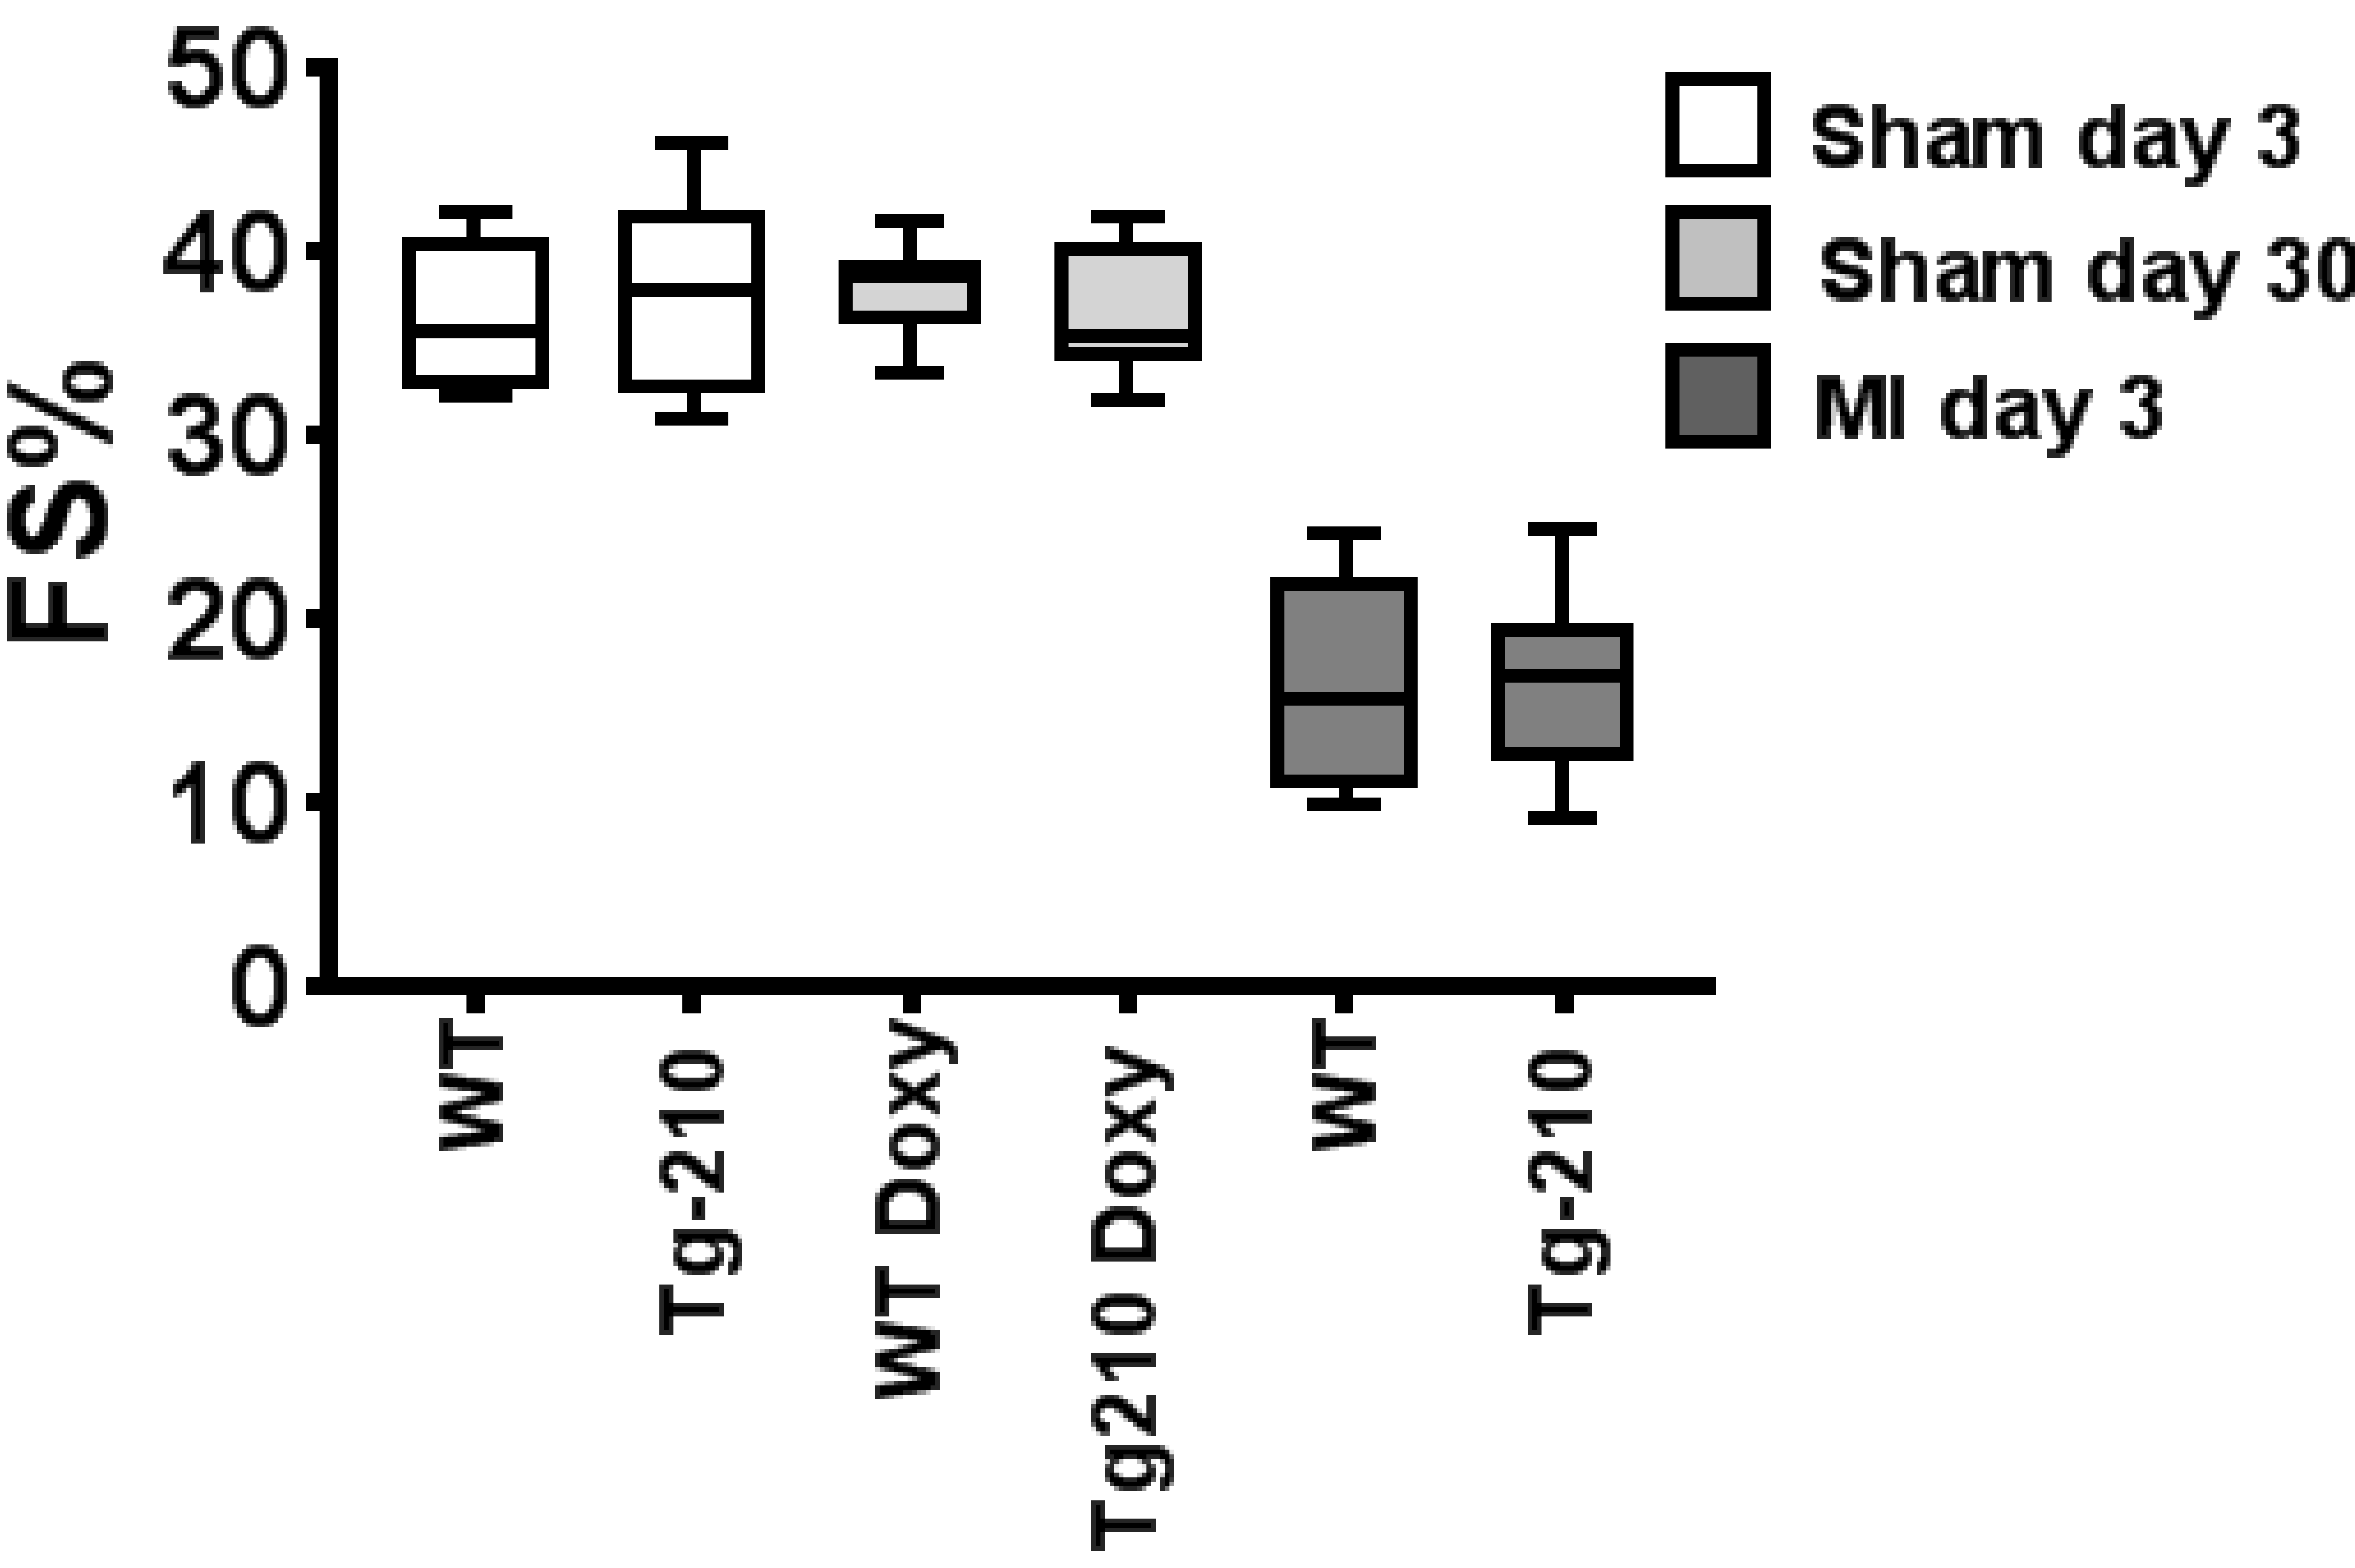

**Fig. S10**

**WT<sup>Doxy</sup>**

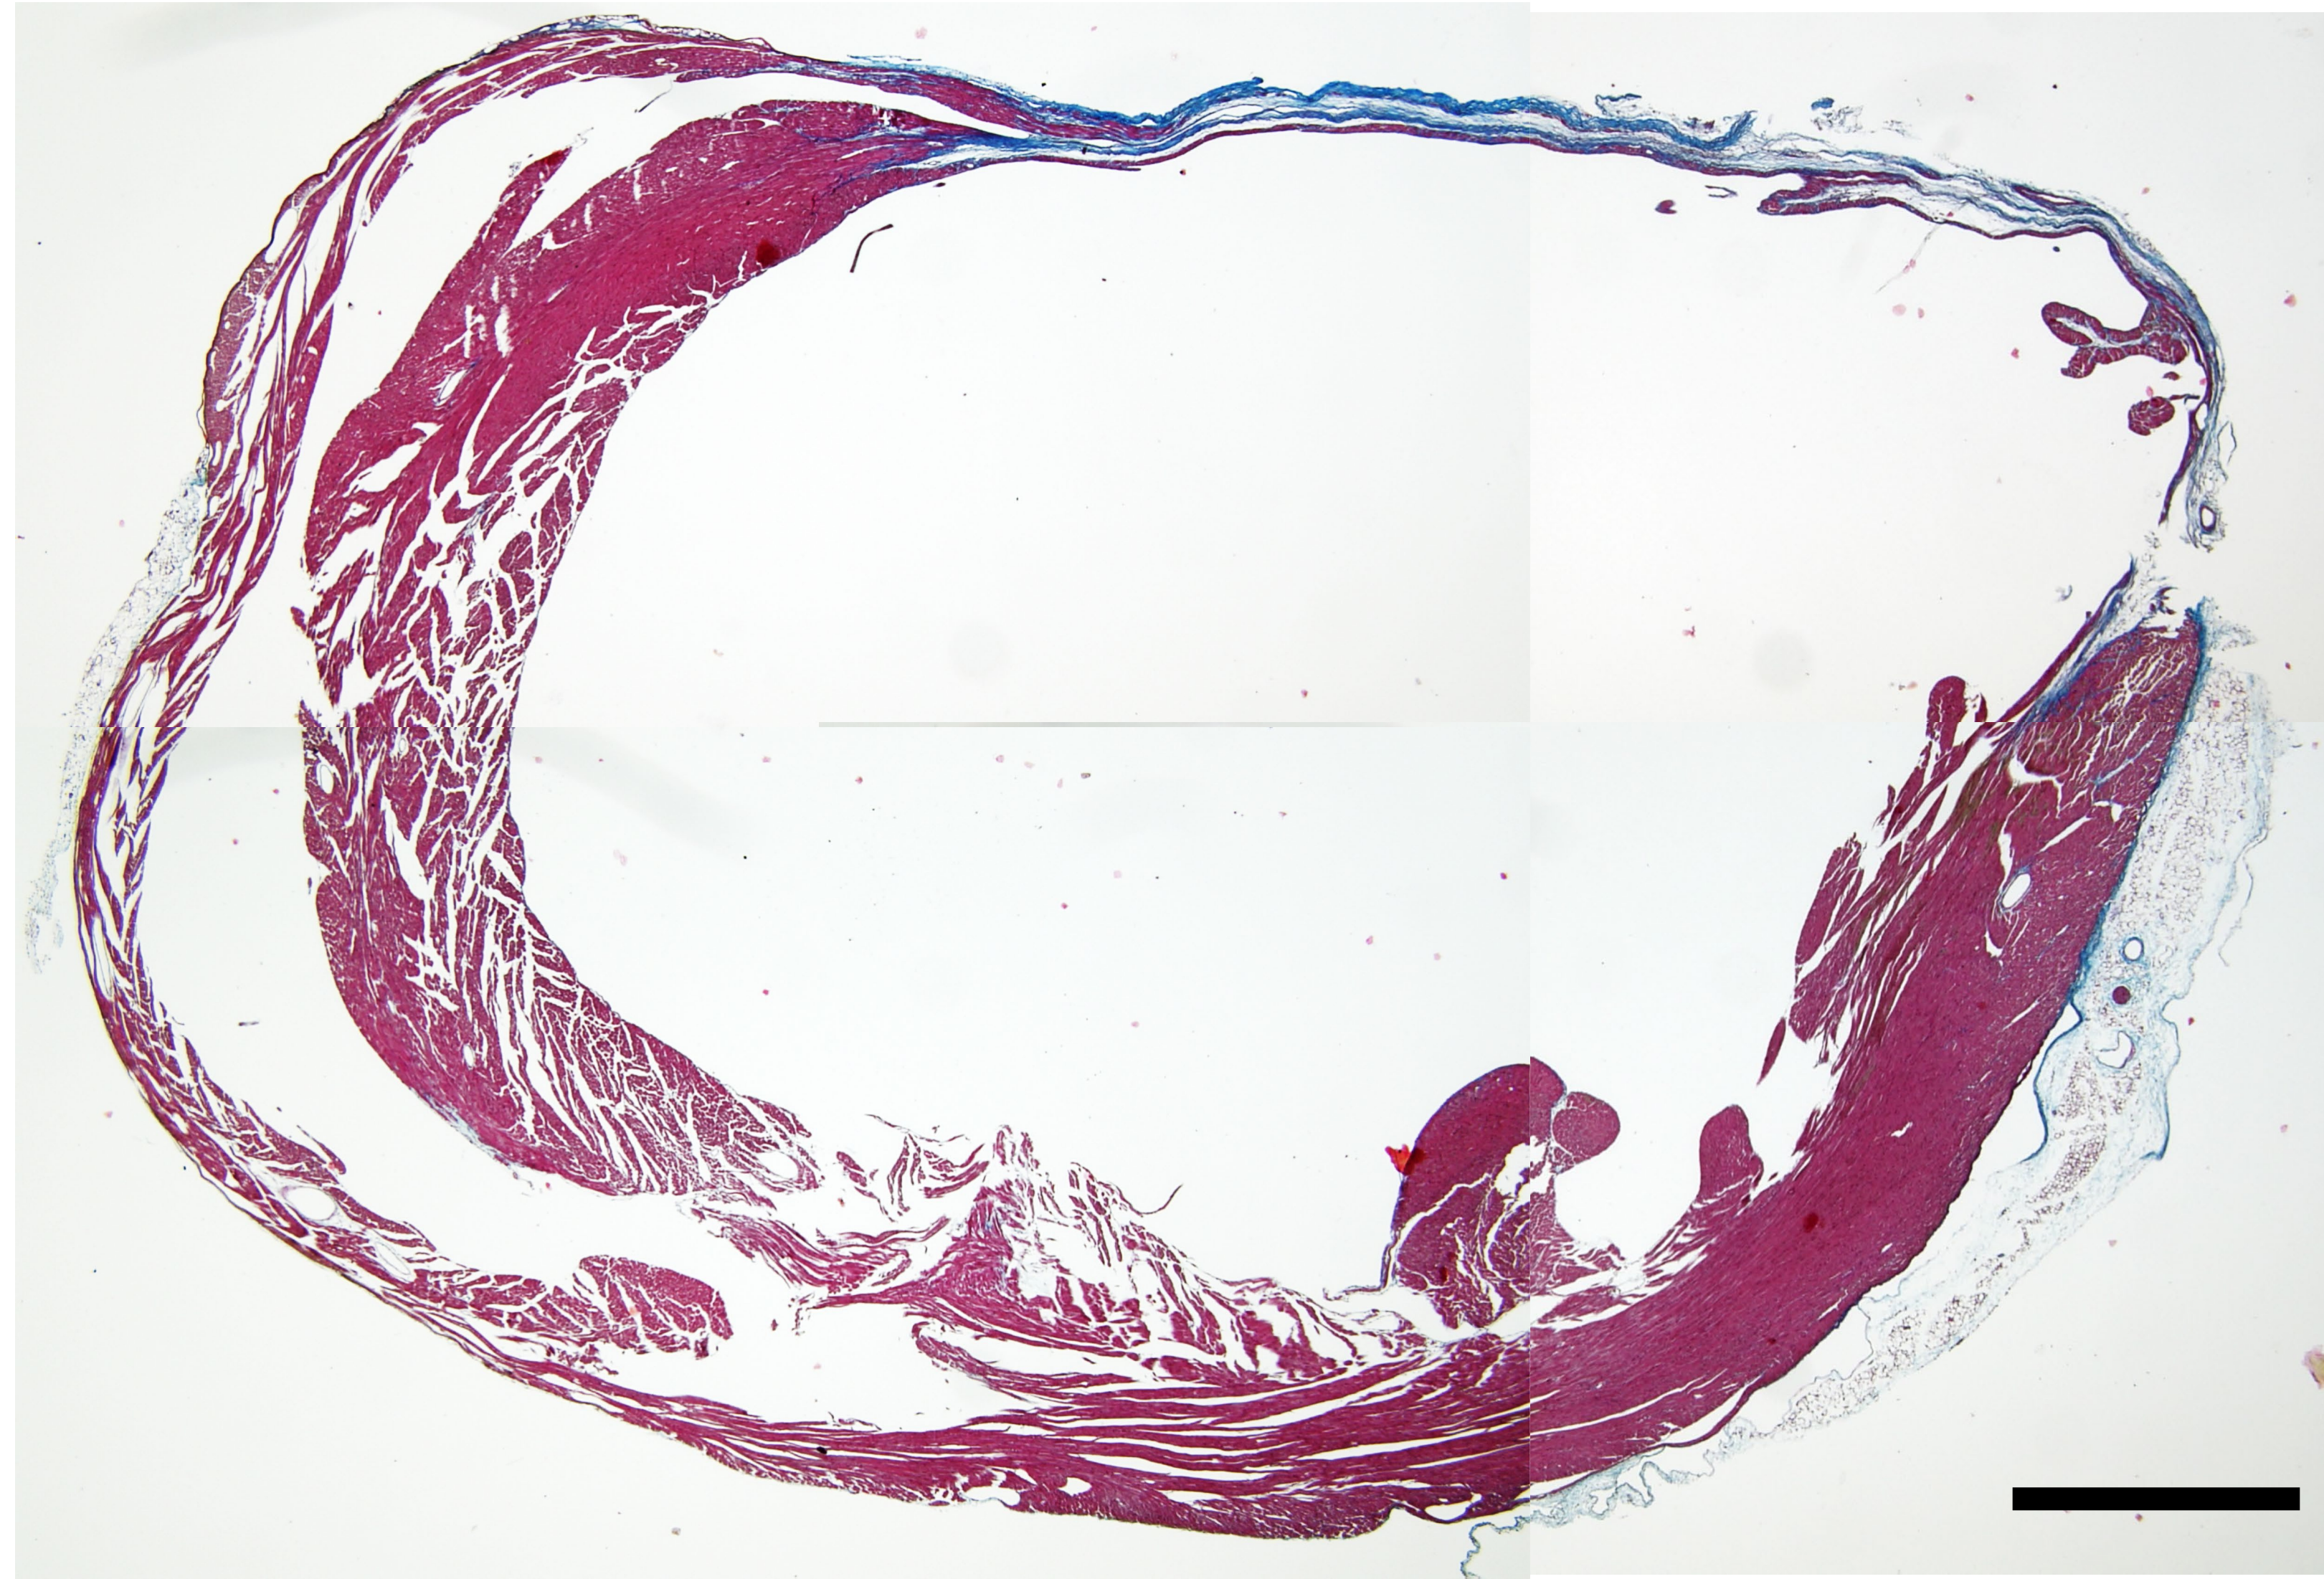

**Tg-210<sup>Doxy</sup>**

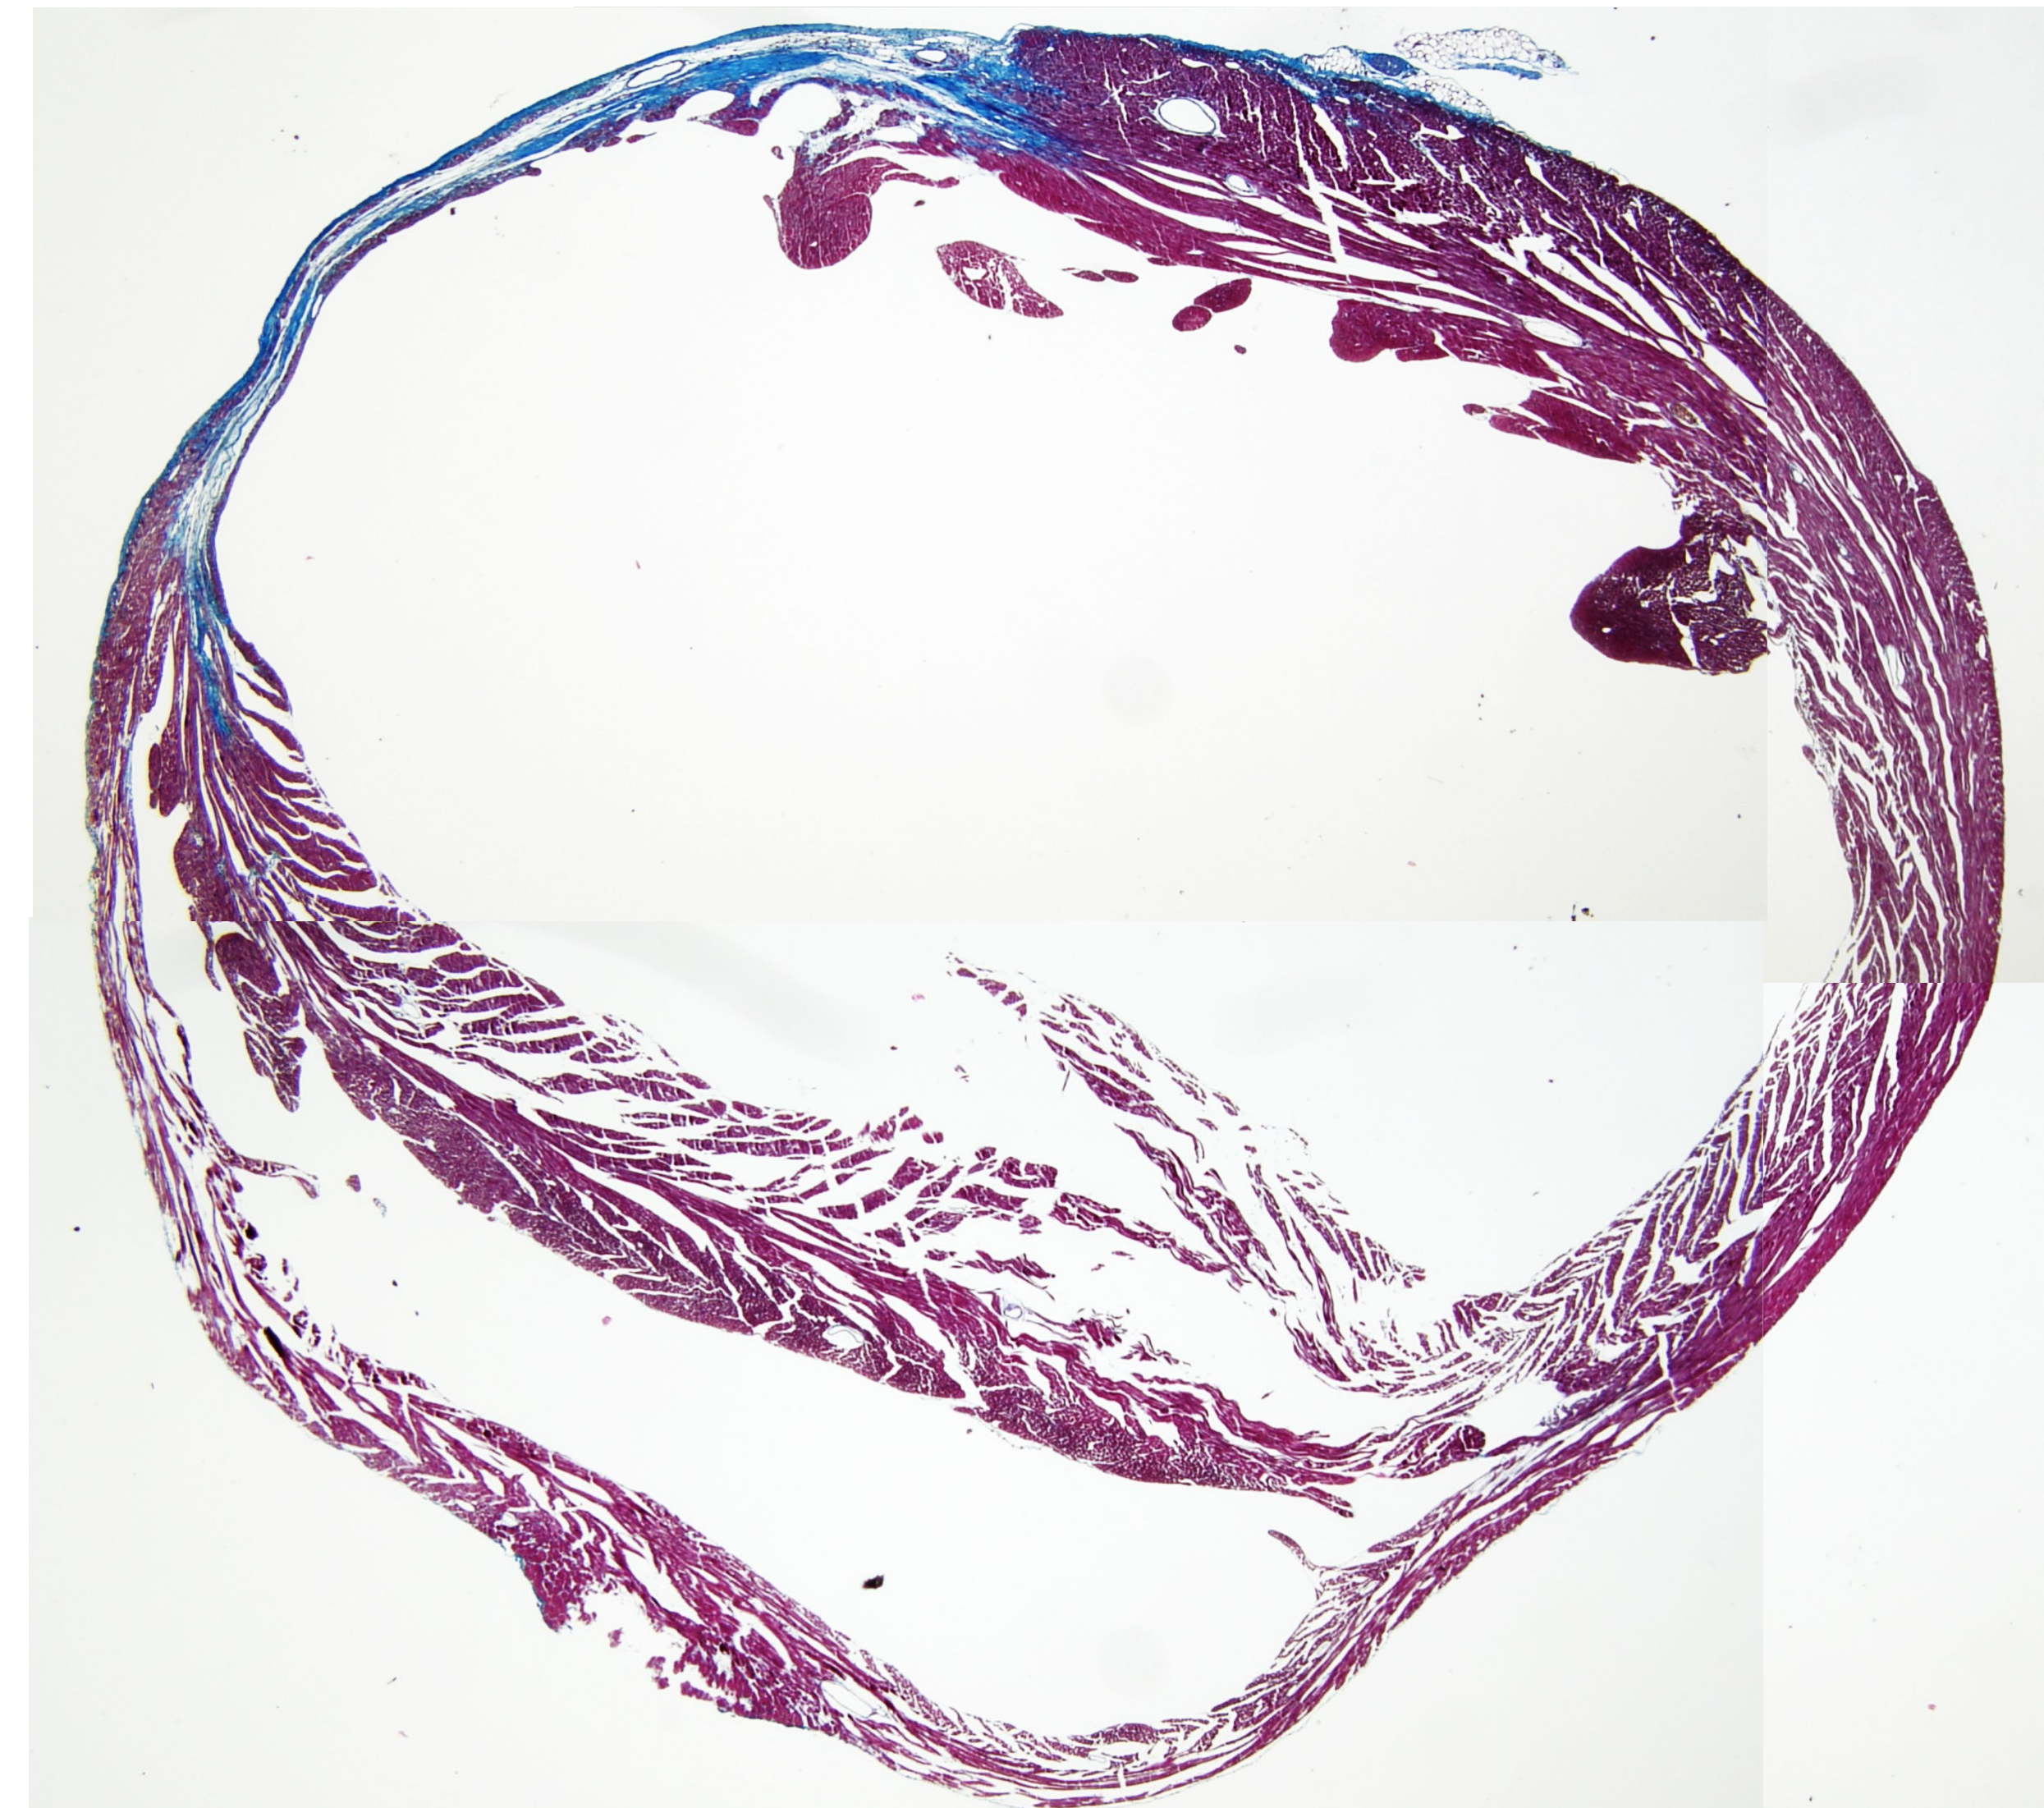

**FIG. S11**

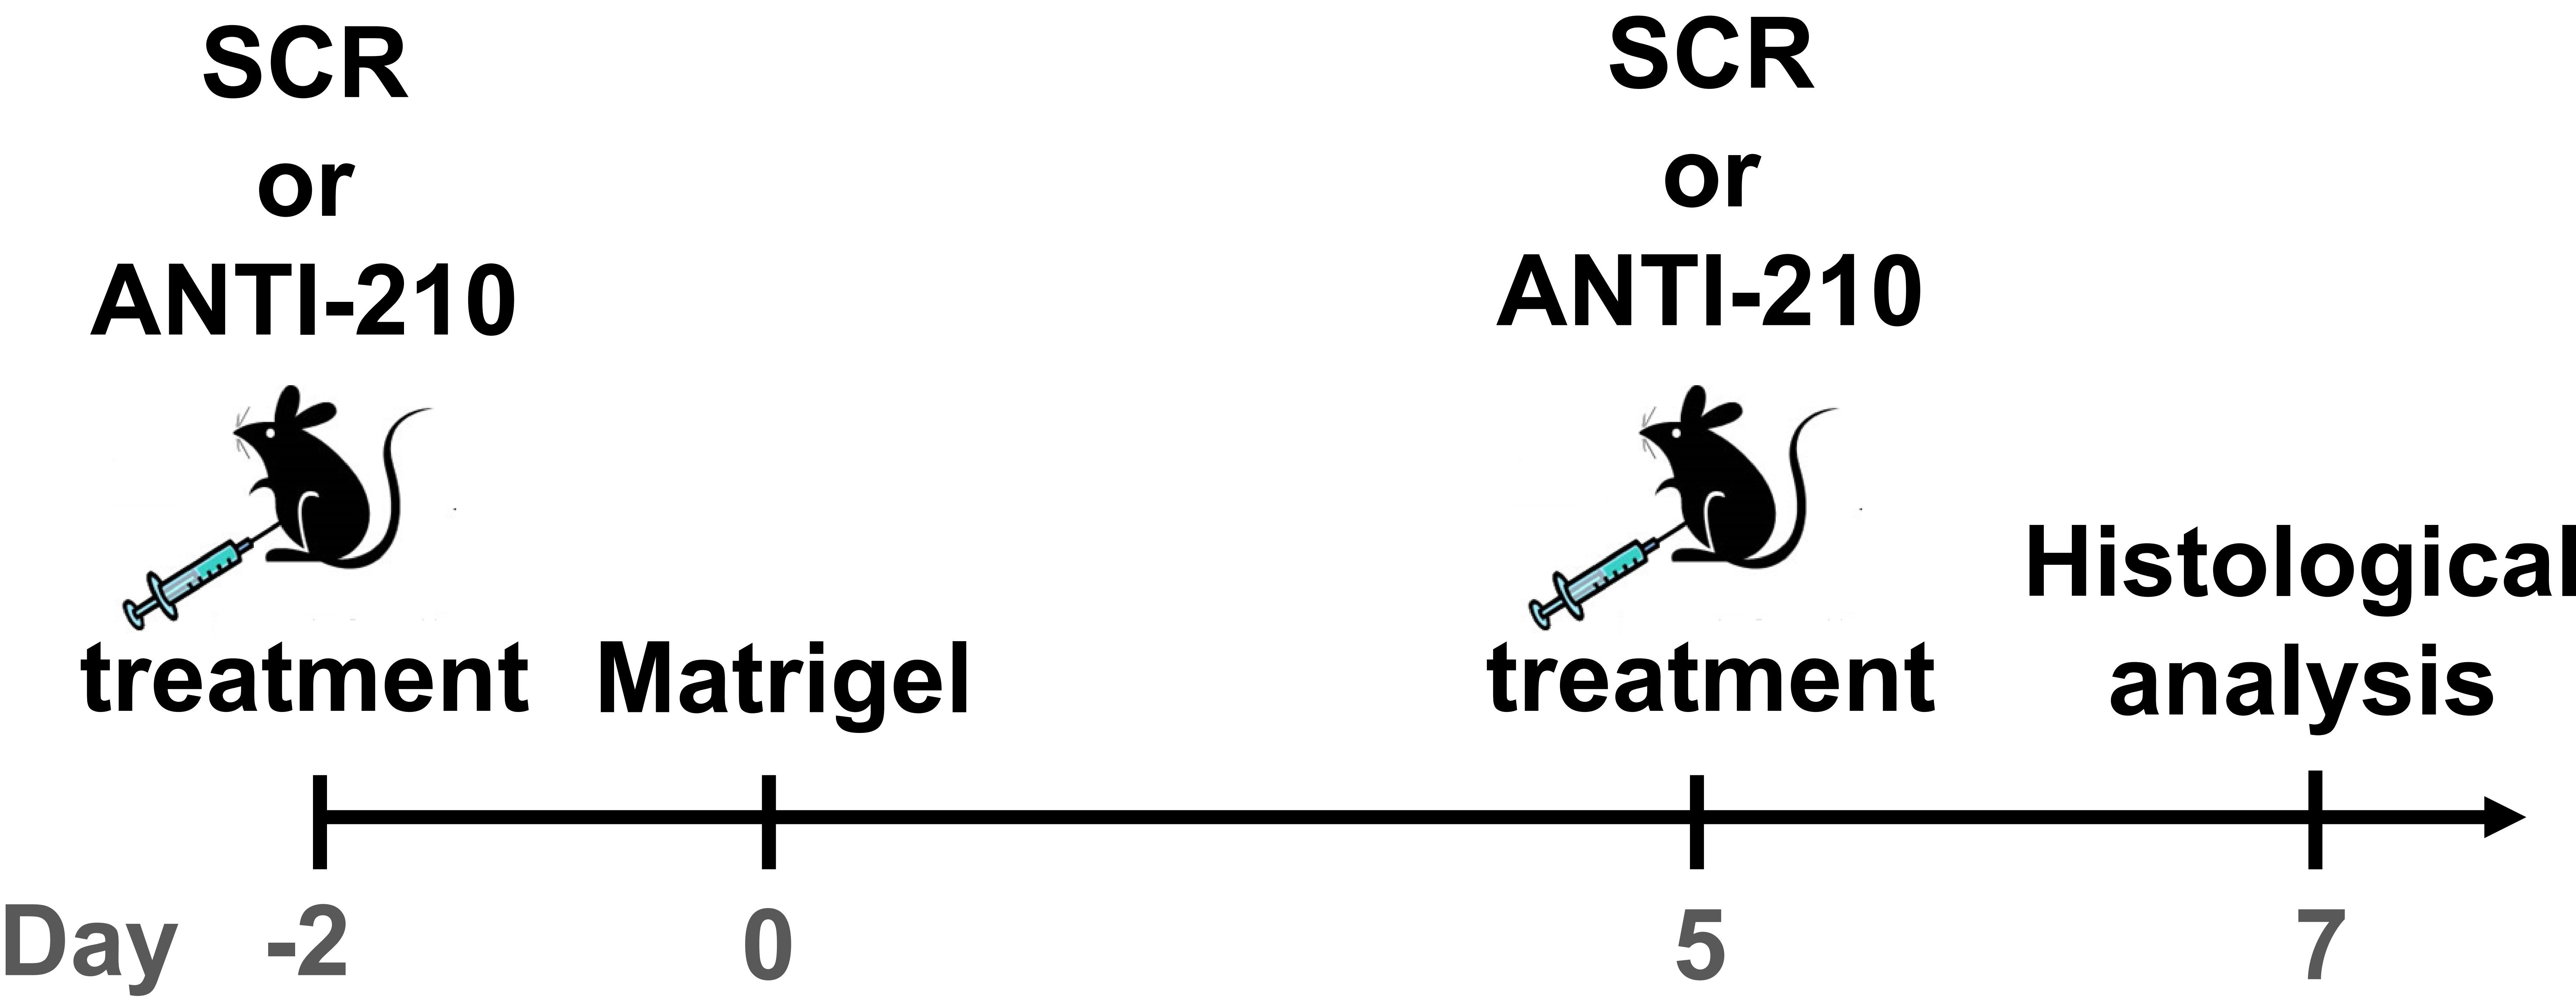

**FIG.S12**

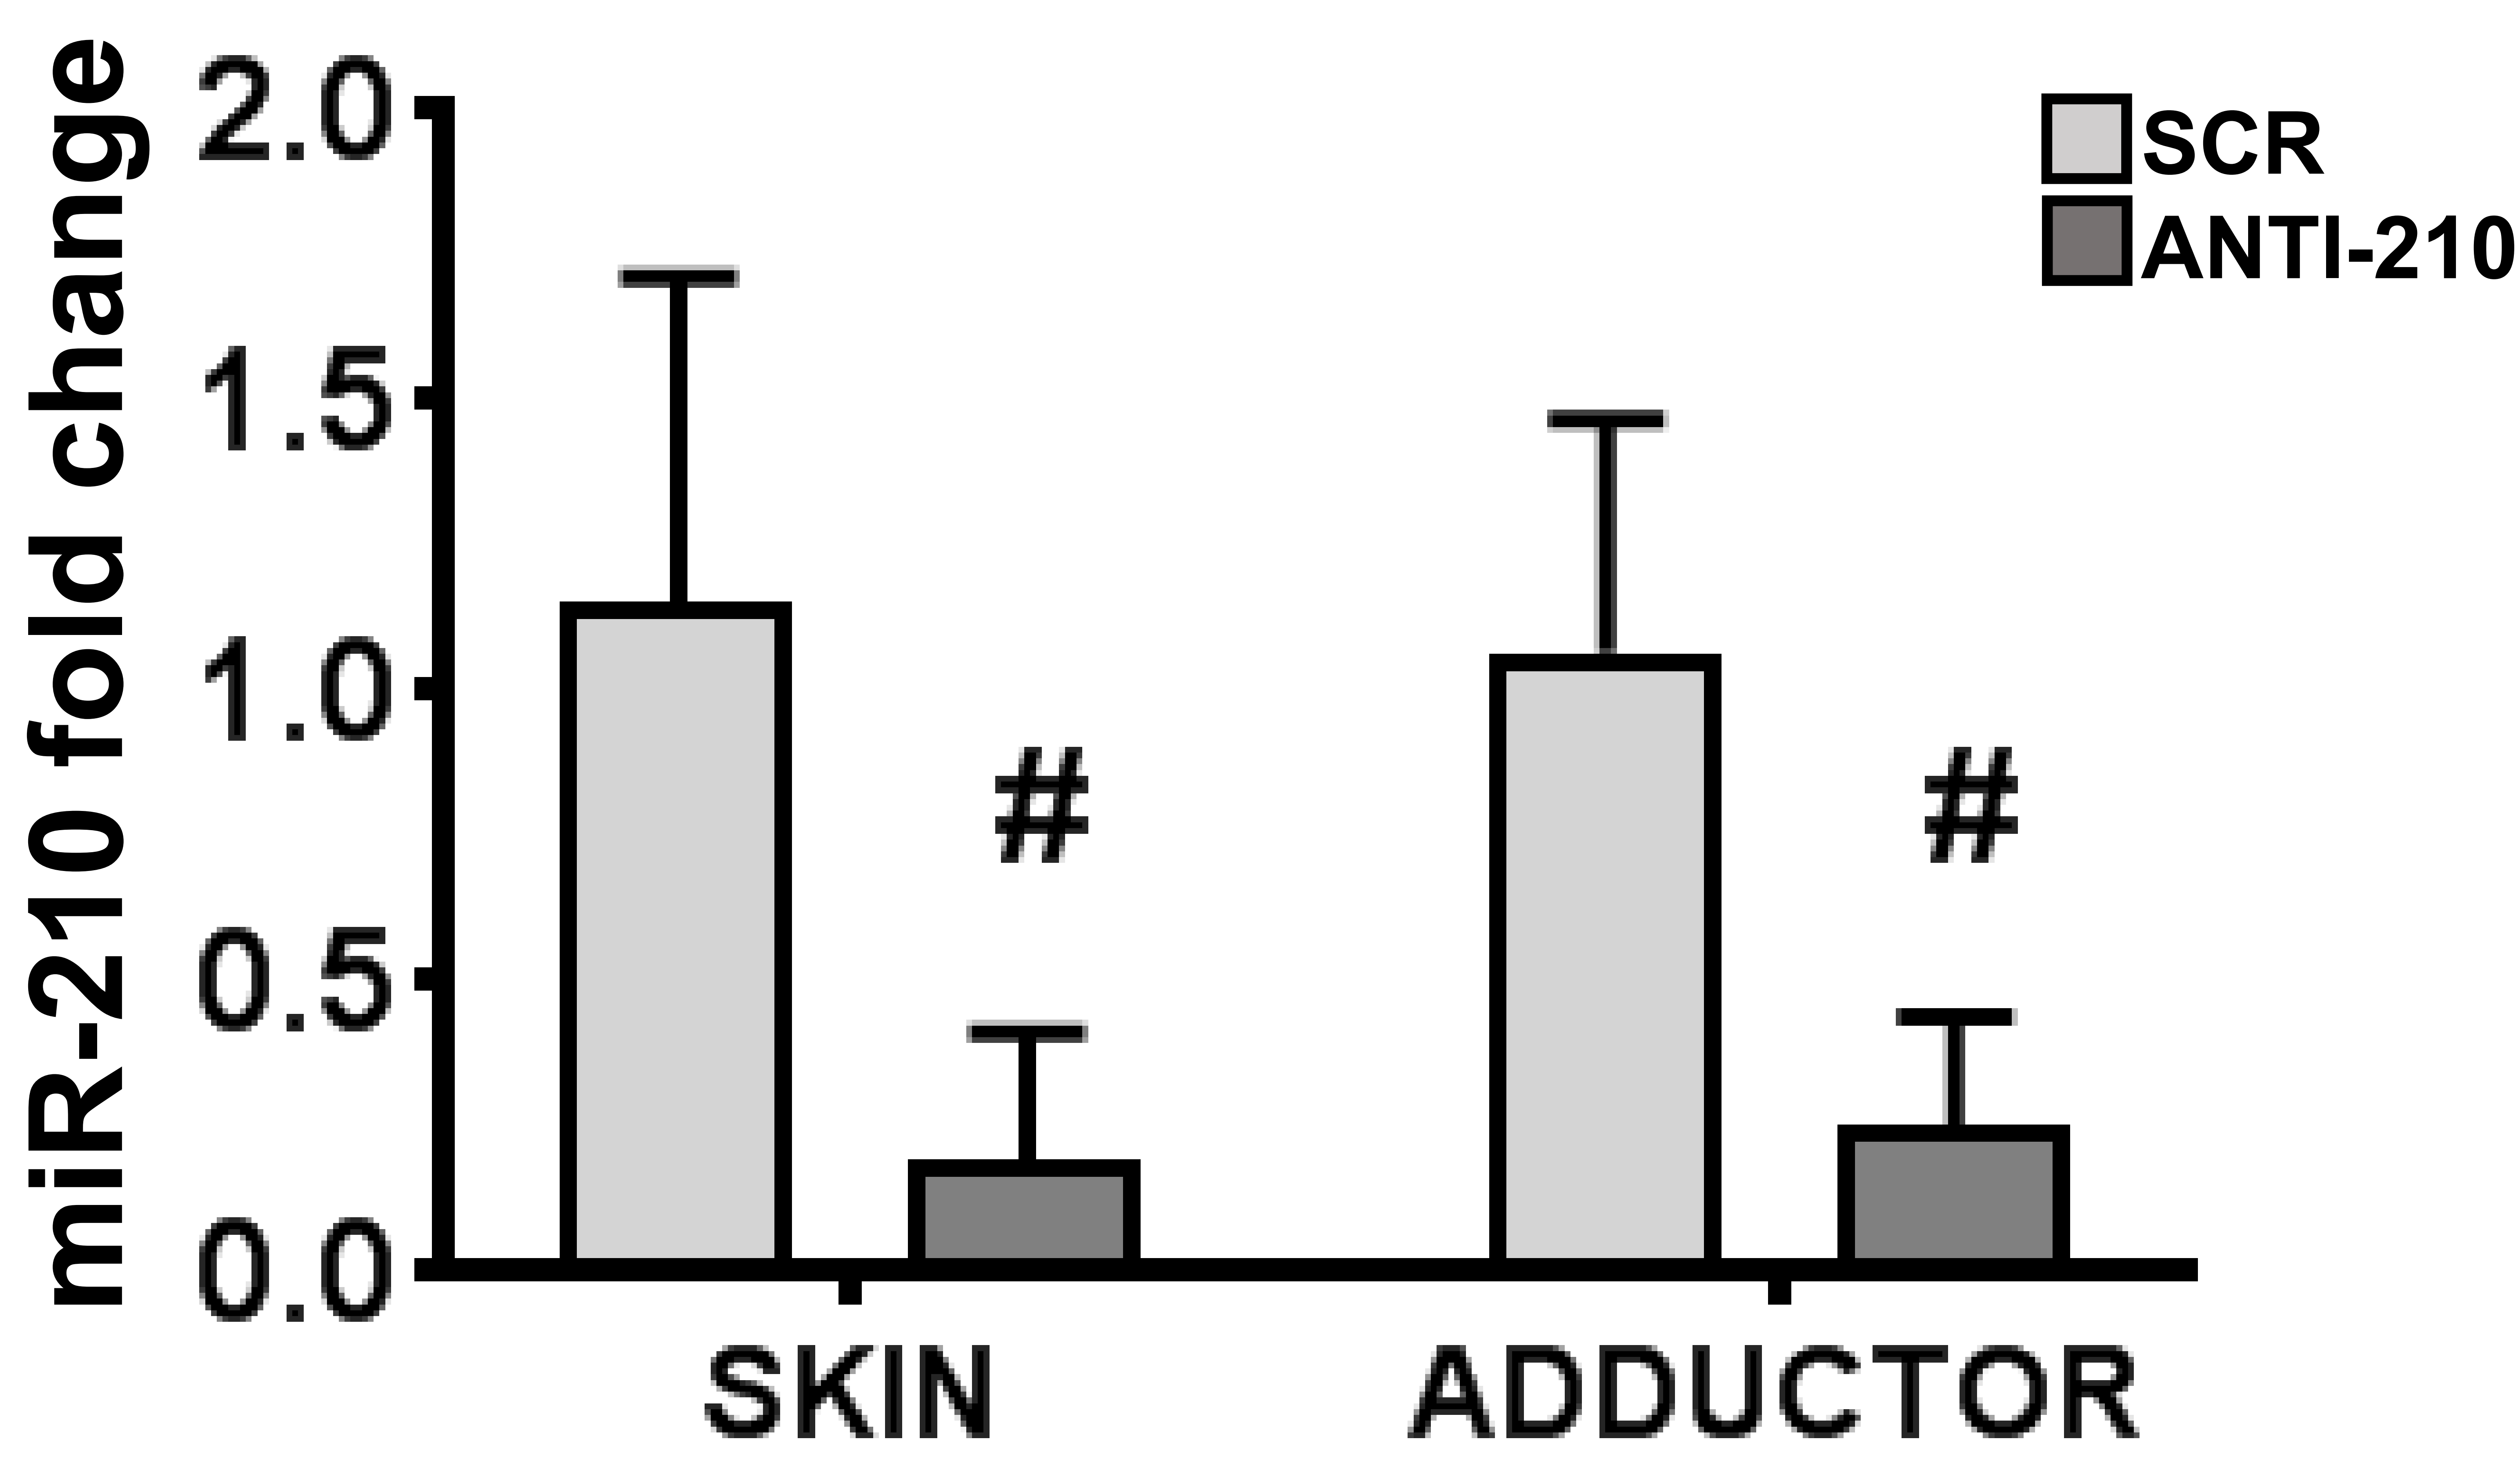

Supplement: Supplementary file 1 [file ijms-21-00129-s001.pdf]
